# Supplementary material for: Integrating Siderophore Substructures in Thiol-Based Metallo-β-Lactamase Inhibitors
Source: MDPI journal article supplement (doi:10.3390/molecules28041984), 2023-02-20

AV500-2021-07-19-mjrpro.37219.1.fid  
 Group AK\_Proshak  
 mjr347-1  
 1H DMSO /nmr/Tag-Messung Tag-Messung 59

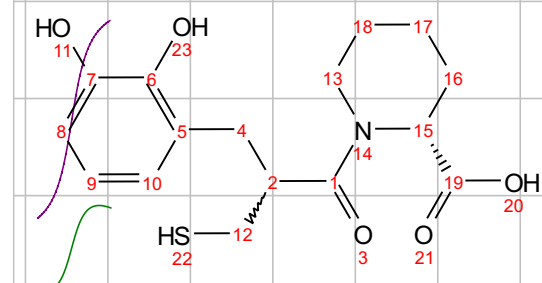

<sup>1</sup>H NMR (500 MHz, DMSO-*d*<sub>6</sub>) δ 12.72 (s, 1H), 9.22 (d, *J* = 11.8 Hz, 1H), 8.43 – 8.22 (m, 1H), 6.68 – 6.62 (m, 1H), 6.55 – 6.51 (m, 1H), 6.50 (d, *J* = 4.4 Hz, 1H), 5.14 (ddd, *J* = 37.3, 6.0, 2.3 Hz, 1H), 4.11 (d, *J* = 13.7 Hz, 1H), 3.29 – 3.11 (m, 2H), 3.03 (td, *J* = 13.1, 3.0 Hz, 1H), 2.87 – 2.71 (m, 1H), 2.34 – 2.10 (m, 2H), 1.72 – 1.59 (m, 2H), 1.58 – 1.38 (m, 2H), 1.35 – 1.07 (m, 2H).

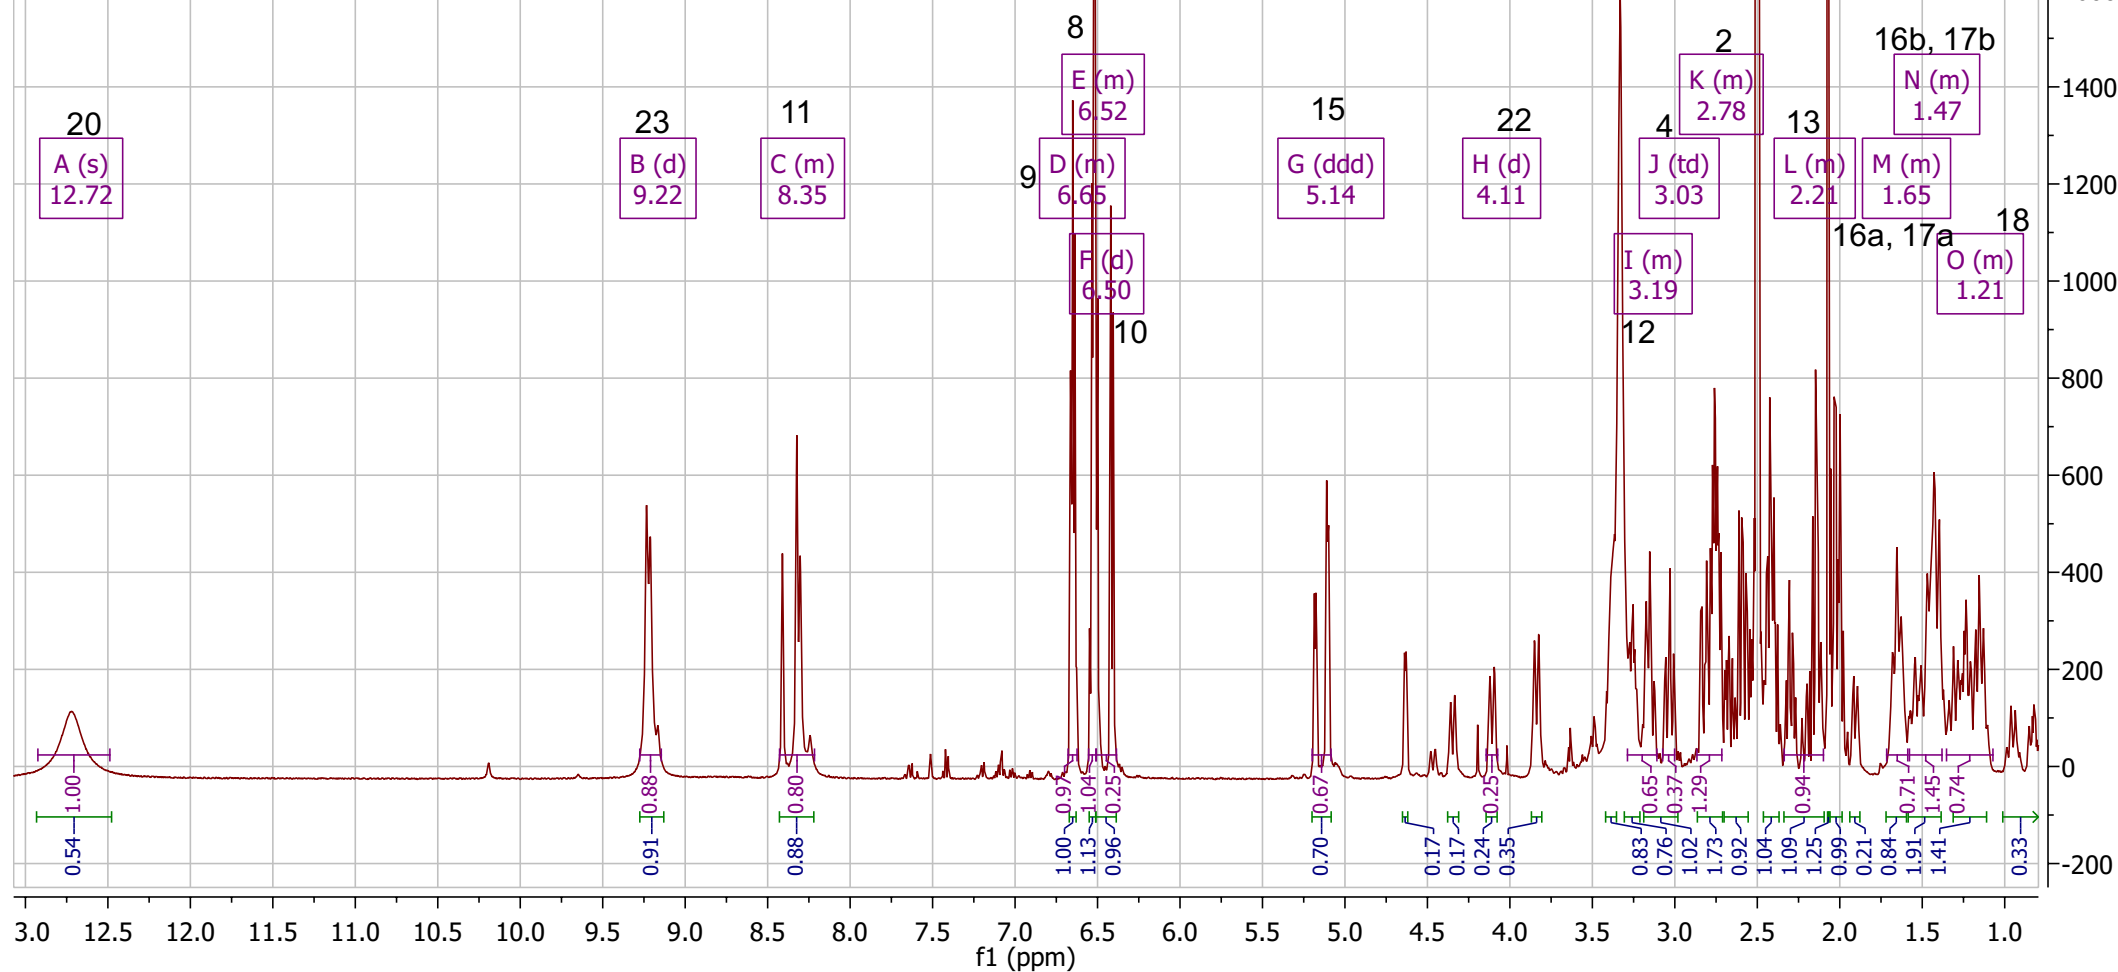

AV500-2021-07-19-mjrpro.37218.1.fid  
Group AK\_Proshak  
mjr345-9  
1H DMSO /nmr/Tag-Messung Tag-Messung 58

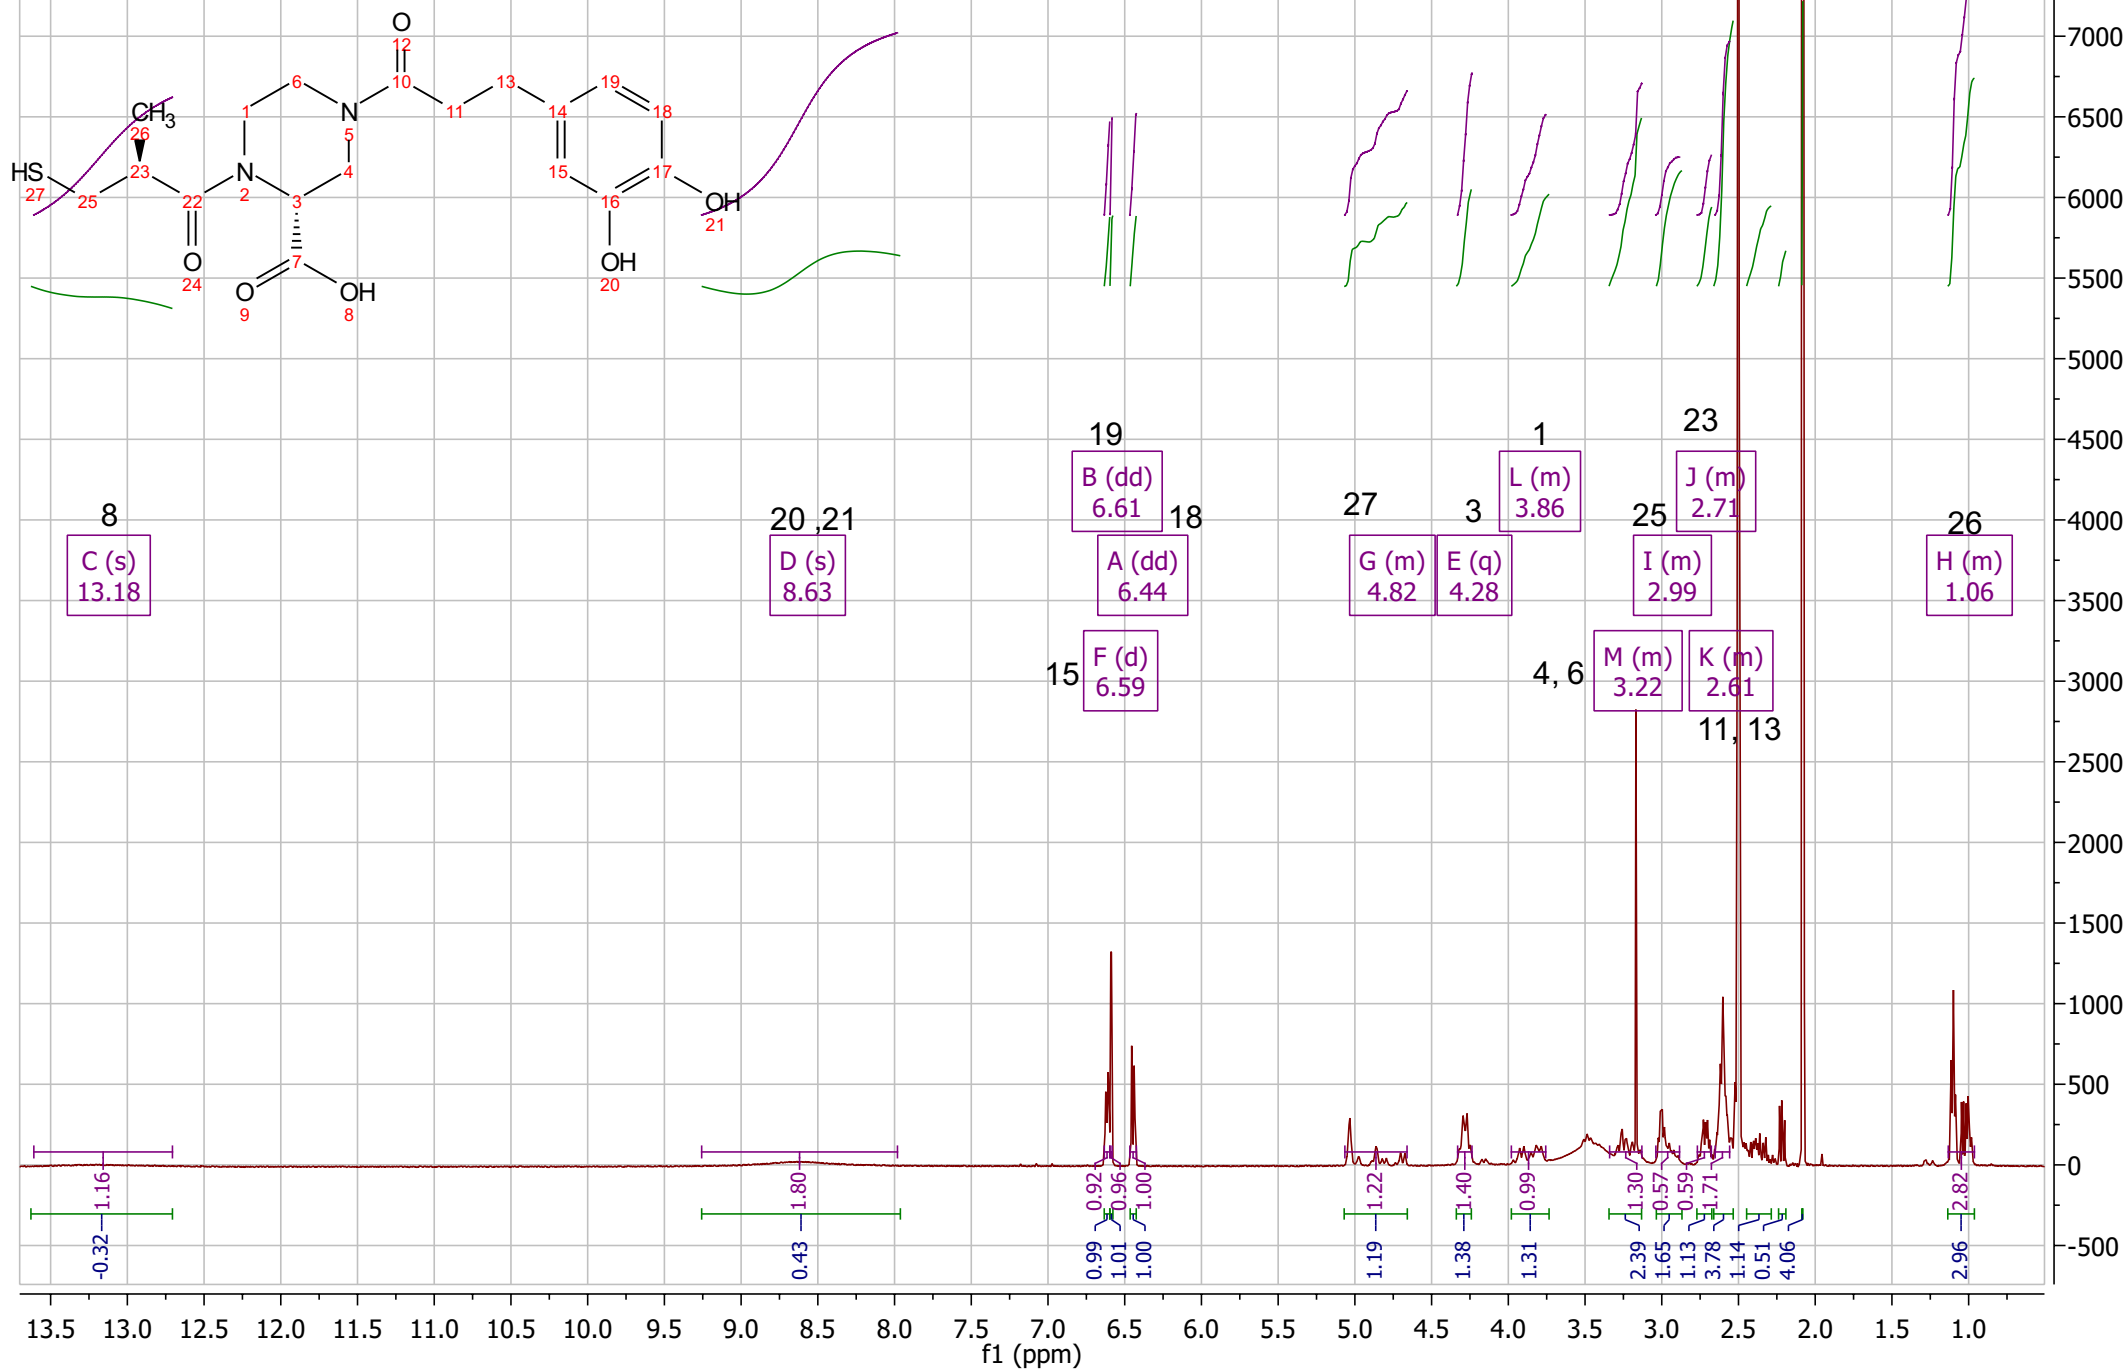

AV400-2021-02-11-mjrpro.39837.1.fid

Group AK\_Proshak

mjr320-1

<sup>1</sup>H DMSO /nmr Tag-Messung 24

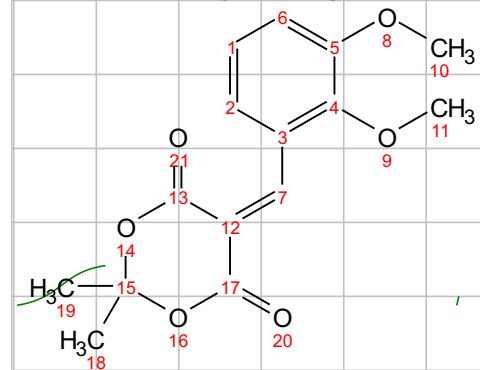

<sup>1</sup>H NMR (400 MHz, DMSO-*d*<sub>6</sub>)  $\delta$  7.32 (d, *J* = 8.1 Hz, 1H), 7.25 (d, *J* = 8.1 Hz, 1H), 7.13 (t, *J* = 8.0 Hz, 1H), 3.85 (s, 3H), 3.79 (s, 3H), 3.31 (s, 1H), 1.77 (s, 6H).

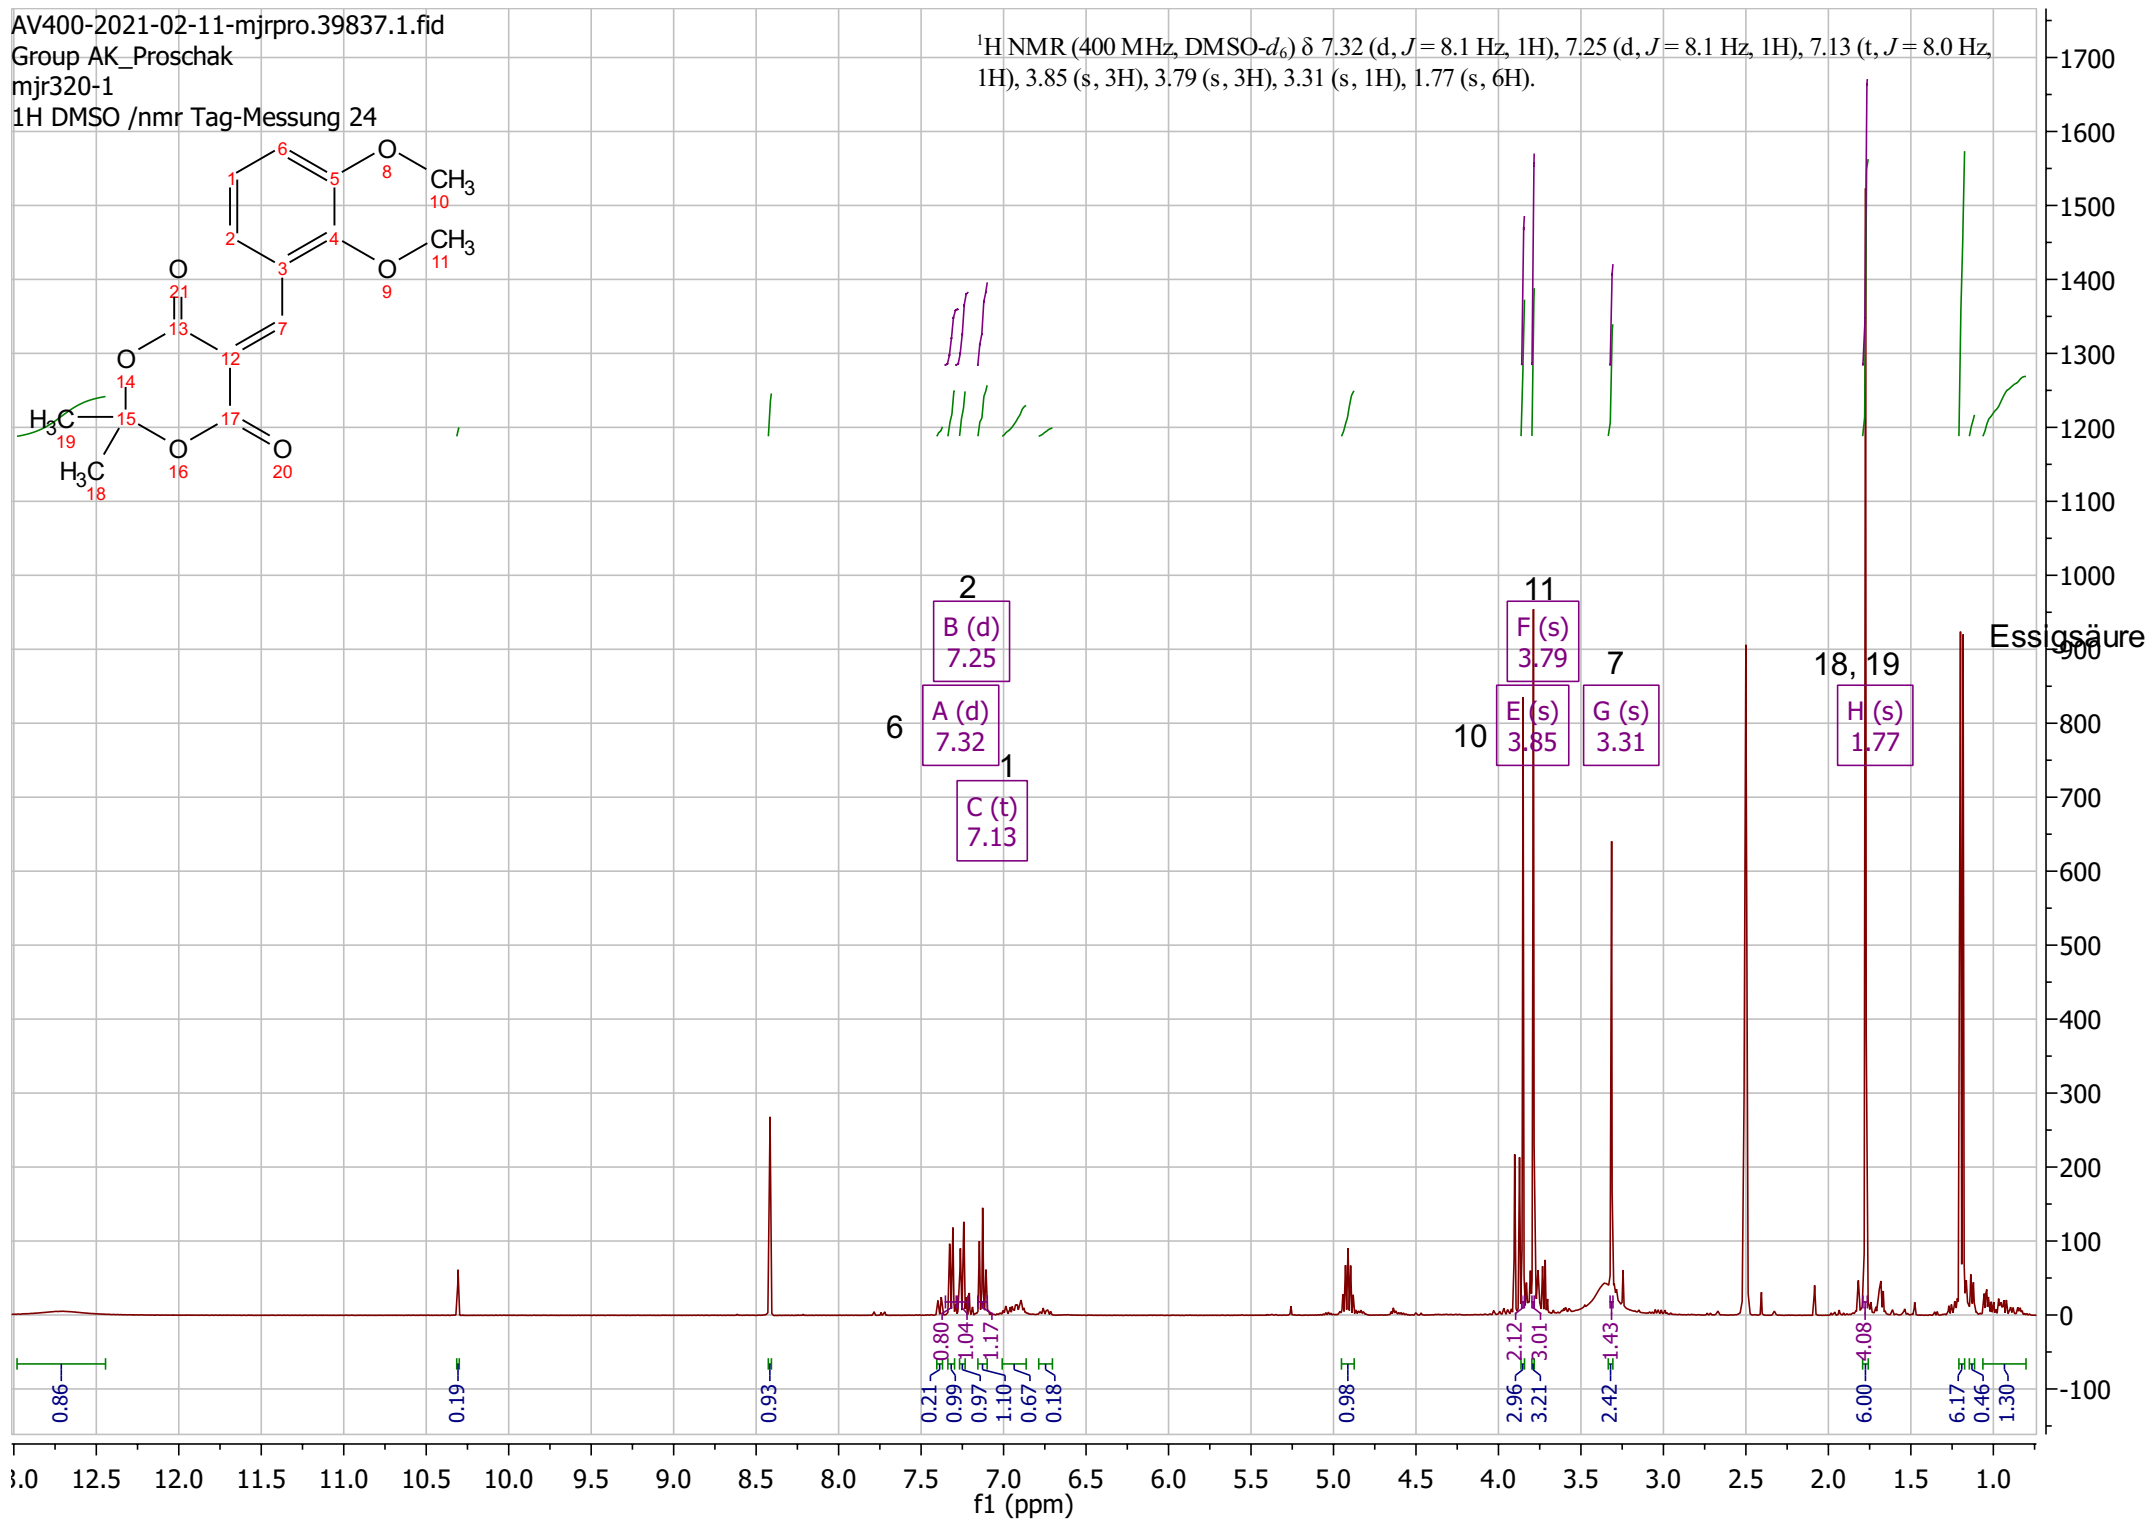

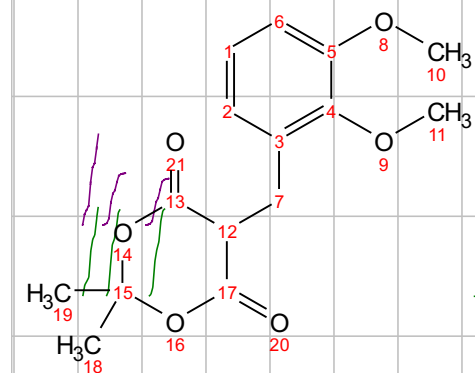

$^1\text{H}$  NMR (400 MHz,  $\text{DMSO}-d_6$ )  $\delta$  6.96 (t,  $J = 7.9$  Hz, 1H), 6.89 (d,  $J = 6.7$  Hz, 1H), 6.75 (d,  $J = 7.0$  Hz, 1H), 4.64 (t,  $J = 5.4$  Hz, 1H), 3.78 (s, 3H), 3.72 (s, 3H), 3.29 (d,  $J = 5.4$  Hz, 2H), 1.82 (s, 3H), 1.68 (s, 3H).

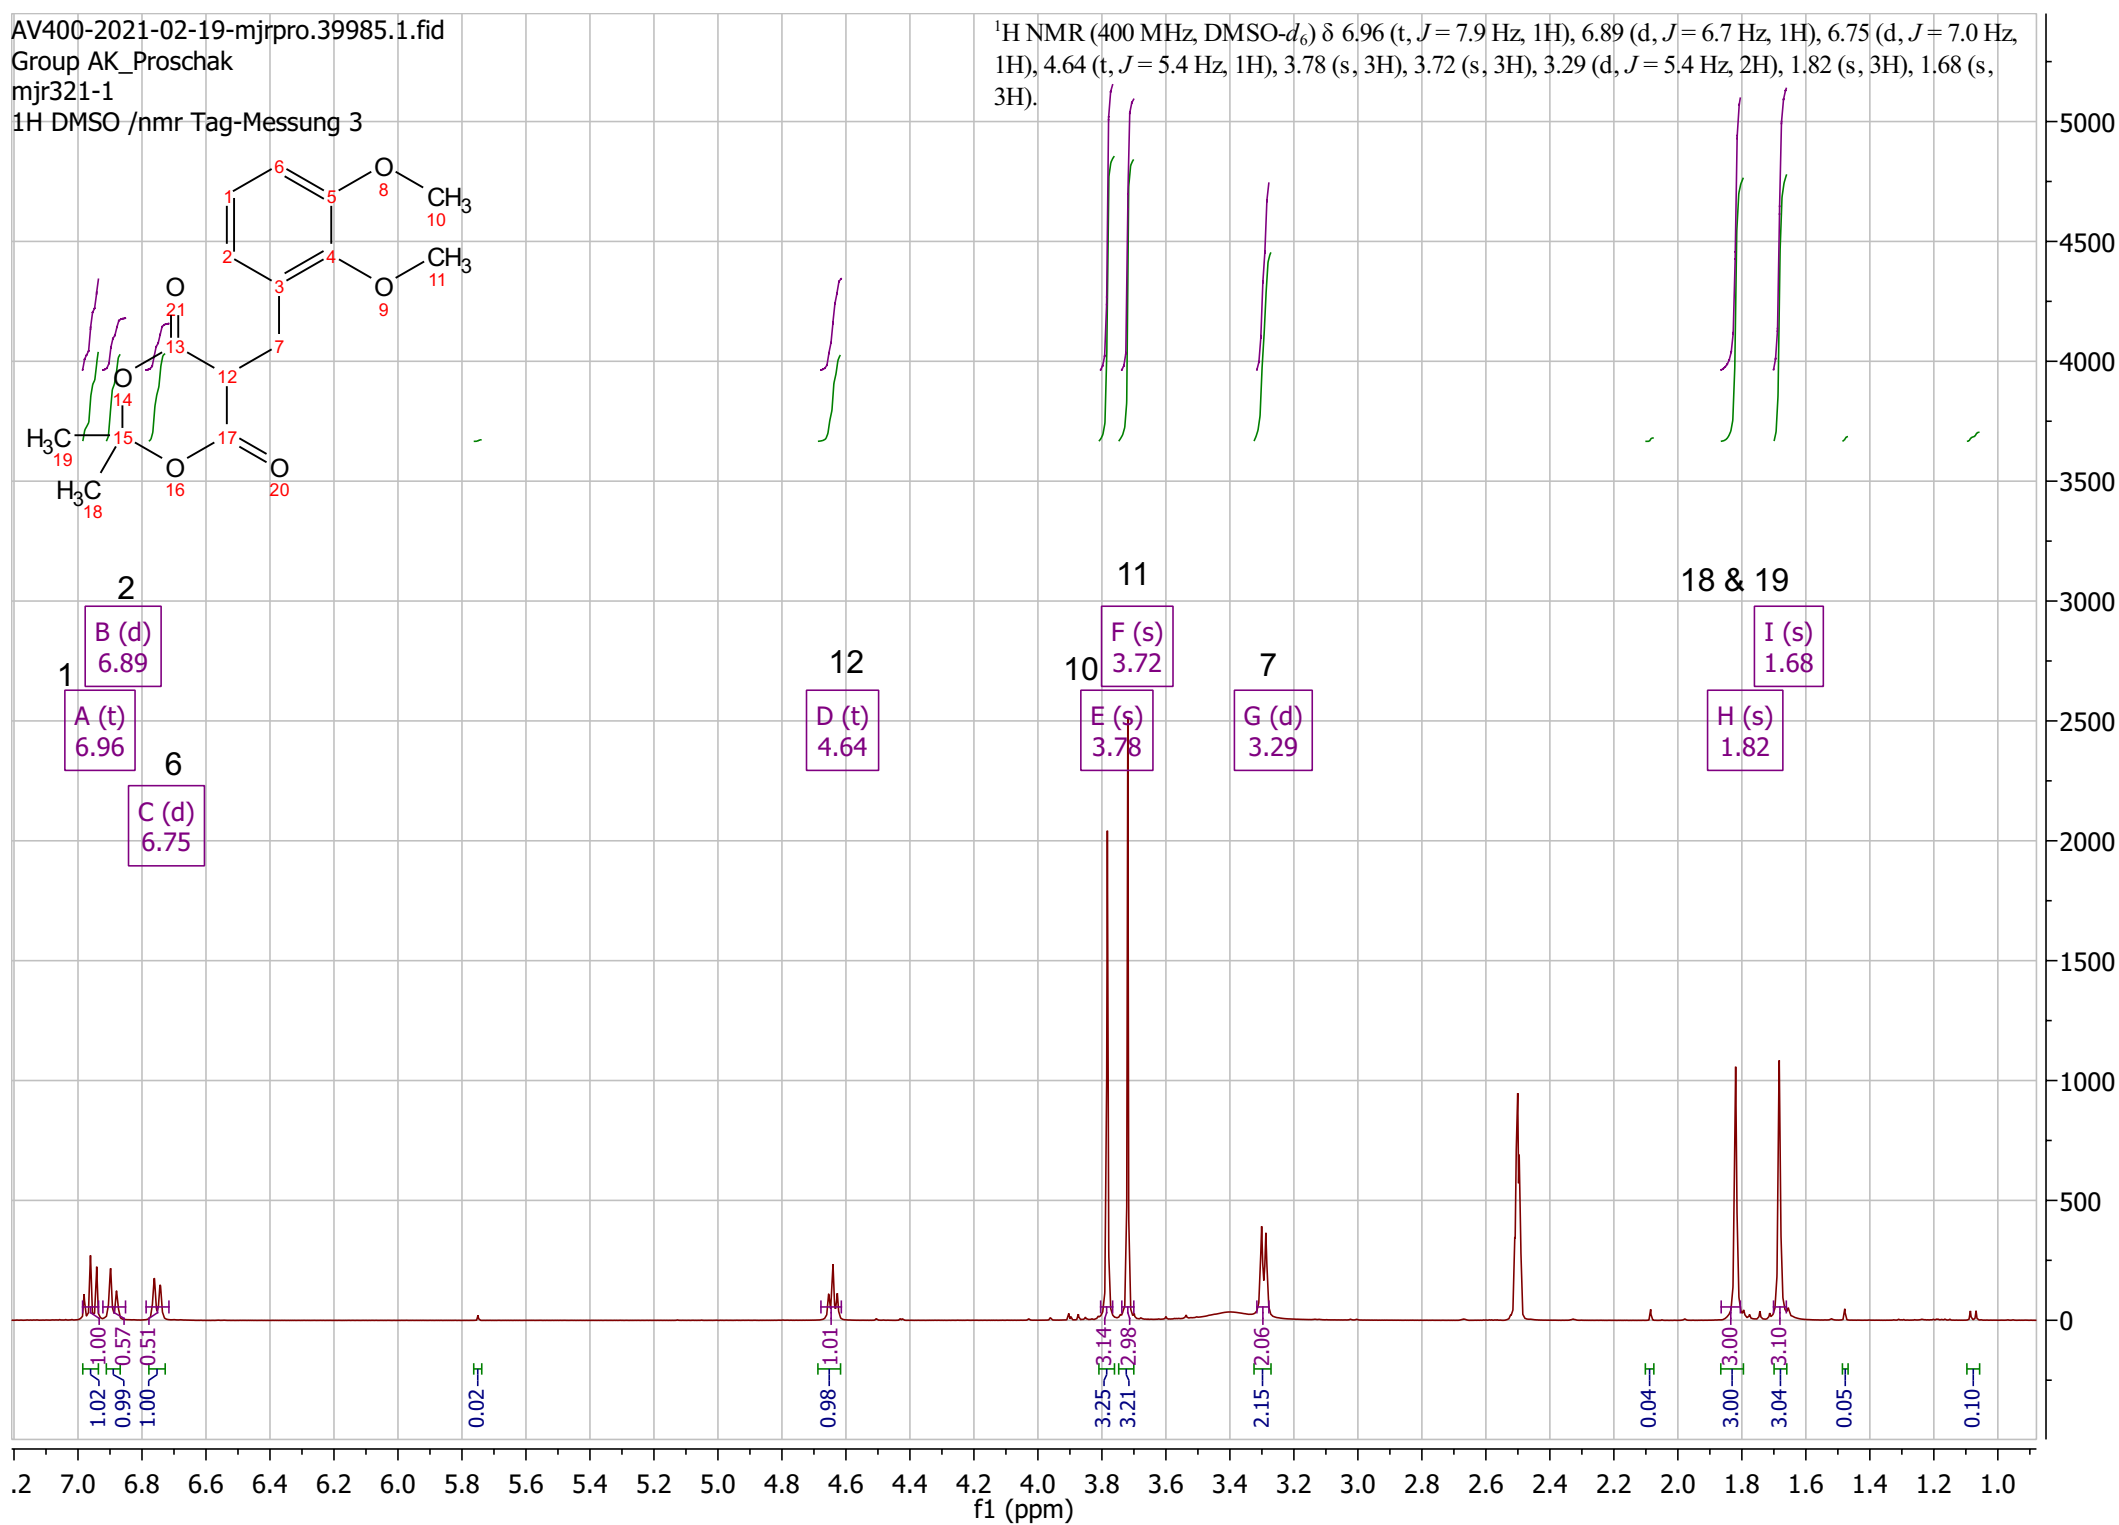

AV400-2021-02-19-mjrpro.39986.1.fid  
 Group AK\_Proshak  
 mjr323-1  
 1H DMSO /nmr Tag-Messung 4

<sup>1</sup>H NMR (400 MHz, DMSO-*d*<sub>6</sub>) δ 7.01 – 6.96 (m, 1H), 6.92 (dd, *J* = 8.2, 1.7 Hz, 1H), 6.69 (dd, *J* = 7.6, 1.6 Hz, 1H), 6.14 (q, *J* = 1.1 Hz, 1H), 5.41 (q, *J* = 1.5 Hz, 1H), 3.79 (s, 3H), 3.68 (s, 3H), 3.67 (s, 3H), 3.56 (t, *J* = 1.2 Hz, 2H).

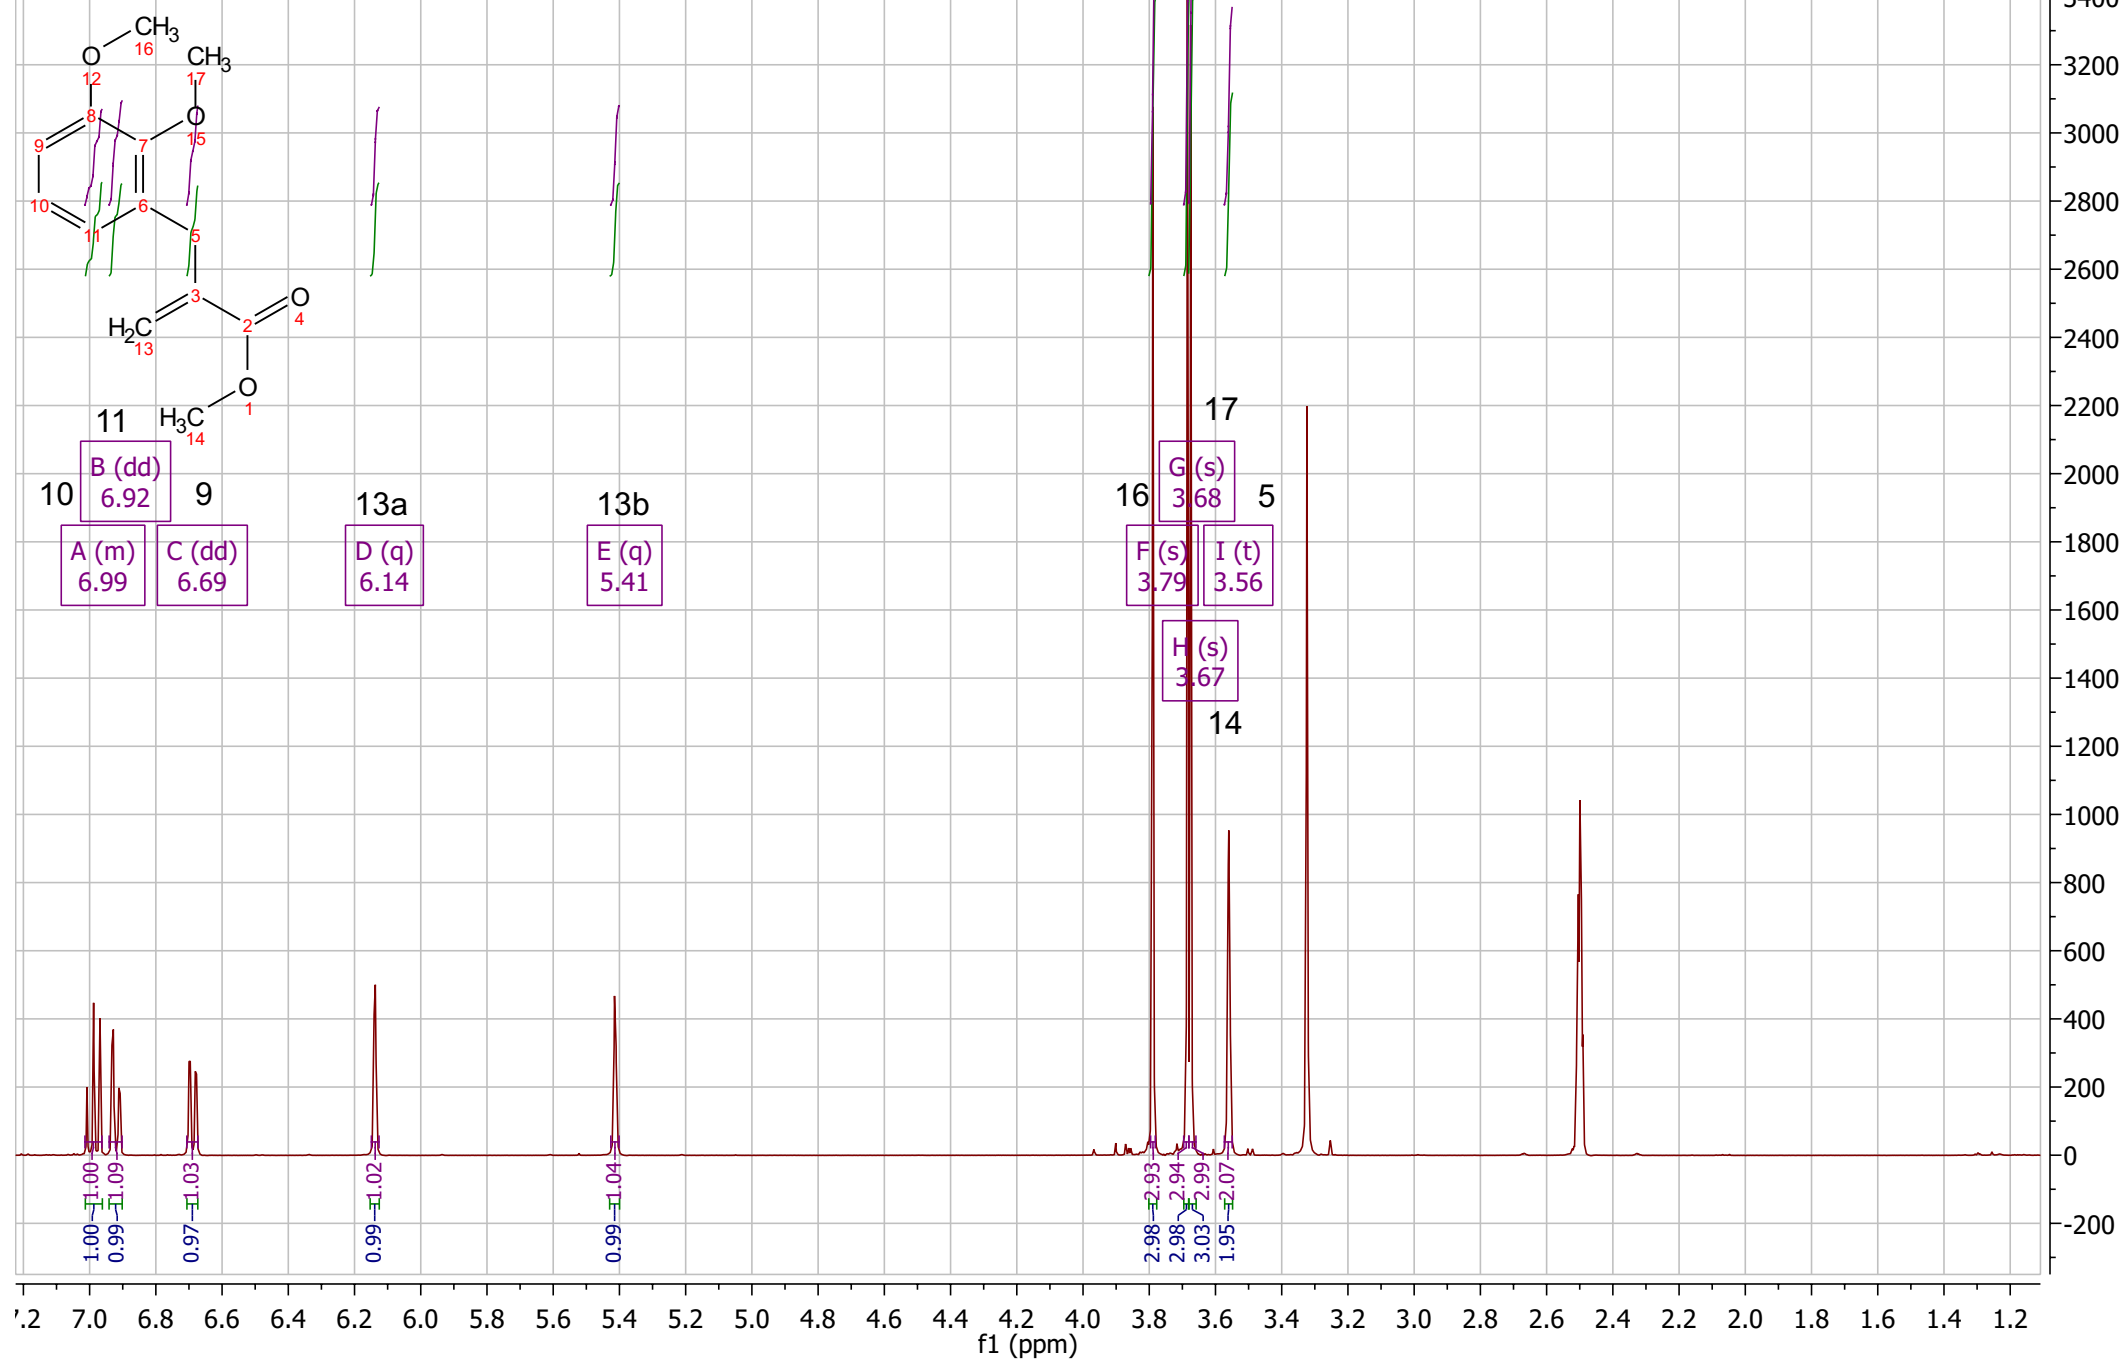

AV400-2021-02-26-mjrpro.40093.1.fid

Group AK\_Proshak

mjr325-P

<sup>1</sup>H DMSO /nmr Tag-Messung 51

<sup>1</sup>H NMR (400 MHz, DMSO-*d*<sub>6</sub>) δ 12.49 (s, 1H), 7.01 – 6.96 (m, 1H), 6.91 (dd, *J* = 8.2, 1.6 Hz, 1H), 6.70 (dd, *J* = 7.6, 1.6 Hz, 1H), 6.13 – 6.07 (m, 1H), 5.34 (q, *J* = 1.6 Hz, 1H), 3.79 (s, 3H), 3.68 (s, 3H), 3.53 (s, 2H).

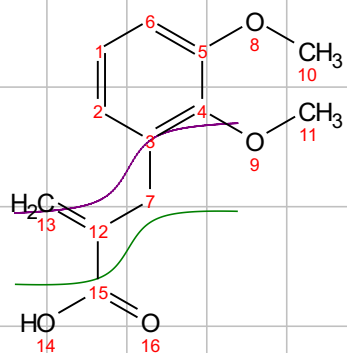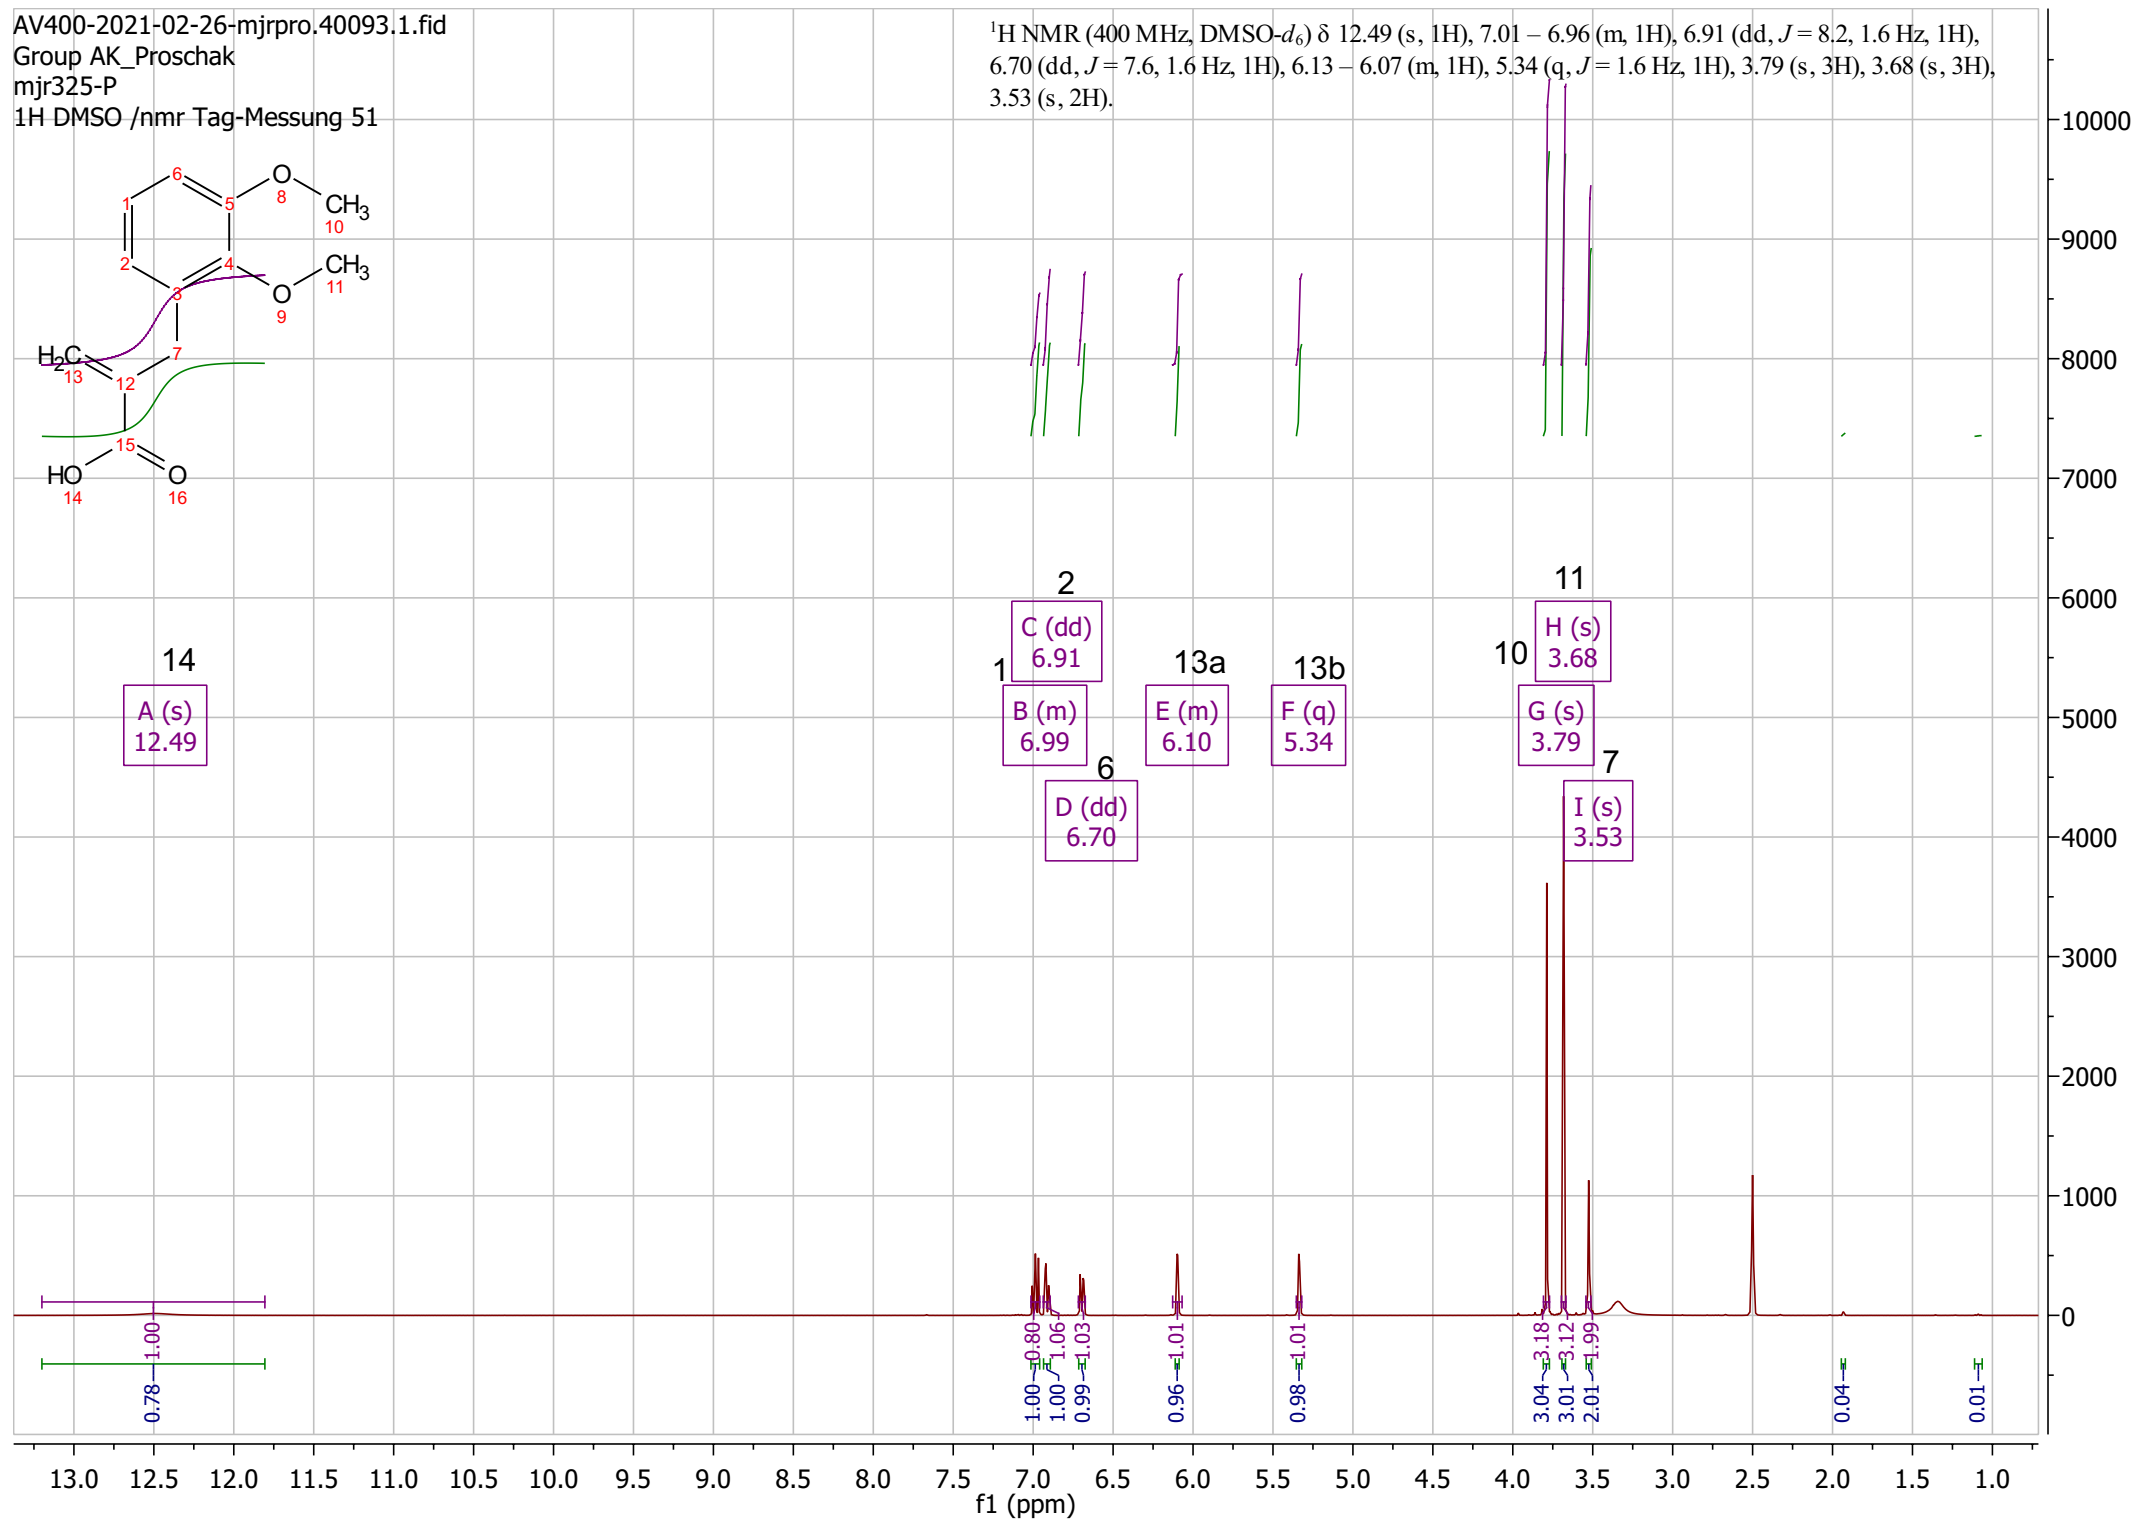

$^1\text{H}$  NMR (400 MHz,  $\text{DMSO}-d_6$ )  $\delta$  7.01 (t,  $J = 7.8$  Hz, 1H), 6.94 (d,  $J = 8.4$  Hz, 1H), 6.74 (t,  $J = 7.8$  Hz, 1H), 5.05 – 4.80 (m, 3H), 3.79 (s, 3H), 3.70 (s, 3H), 3.51 – 3.43 (m, 2H), 3.03 (t,  $J = 13.0$  Hz, 1H), 2.61 (t,  $J = 12.5$  Hz, 1H), 2.02 (dd,  $J = 54.8, 13.2$  Hz, 2H), 1.64 – 1.56 (m, 1H), 1.41 (s, 9H), 1.27 – 0.95 (m, 3H).

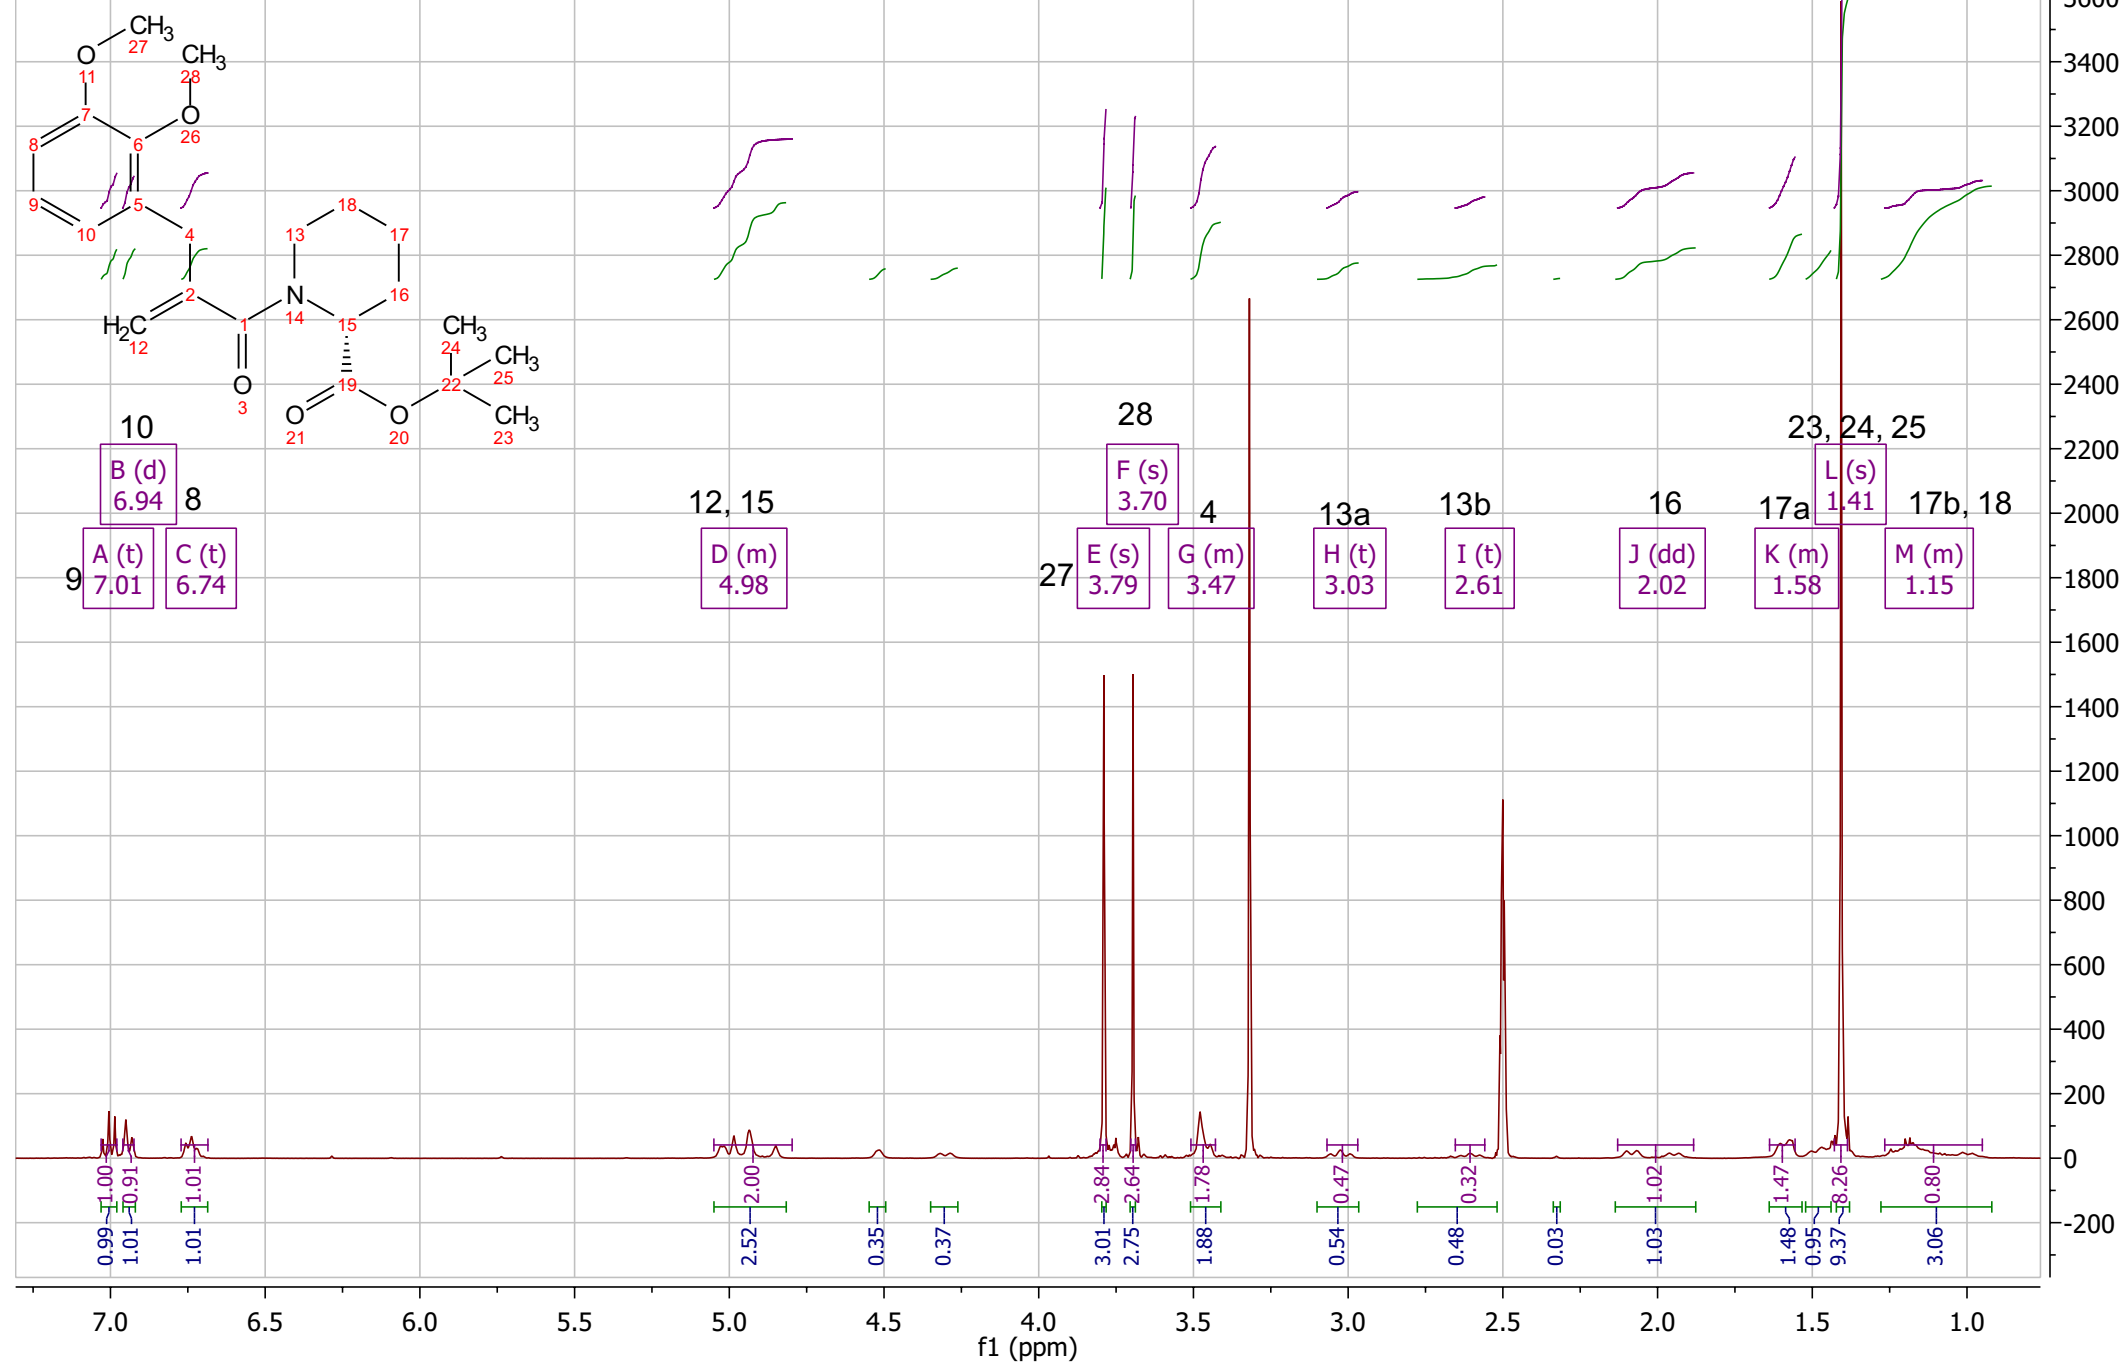

AV400-2021-05-05-mjrpro.40938.1.fid

Group AK\_Proshak

mjr328-4

<sup>1</sup>H DMSO /nmr Tag-Messung 18

<sup>1</sup>H NMR (400 MHz, DMSO-*d*<sub>6</sub>) δ 6.98 – 6.91 (m, 2H), 6.69 (td, *J* = 6.7, 2.4 Hz, 1H), 5.10 – 4.98 (m, 1H), 3.79 (s, 3H), 3.74 (s, 3H), 3.27 – 3.08 (m, 2H), 3.02 – 2.87 (m, 2H), 2.74 (d, *J* = 7.4 Hz, 1H), 2.27 (s, 3H), 2.01 (s, 2H), 1.72 – 1.62 (m, 2H), 1.55 – 1.45 (m, 2H), 1.41 (s, 9H), 1.32 – 1.22 (m, 2H).

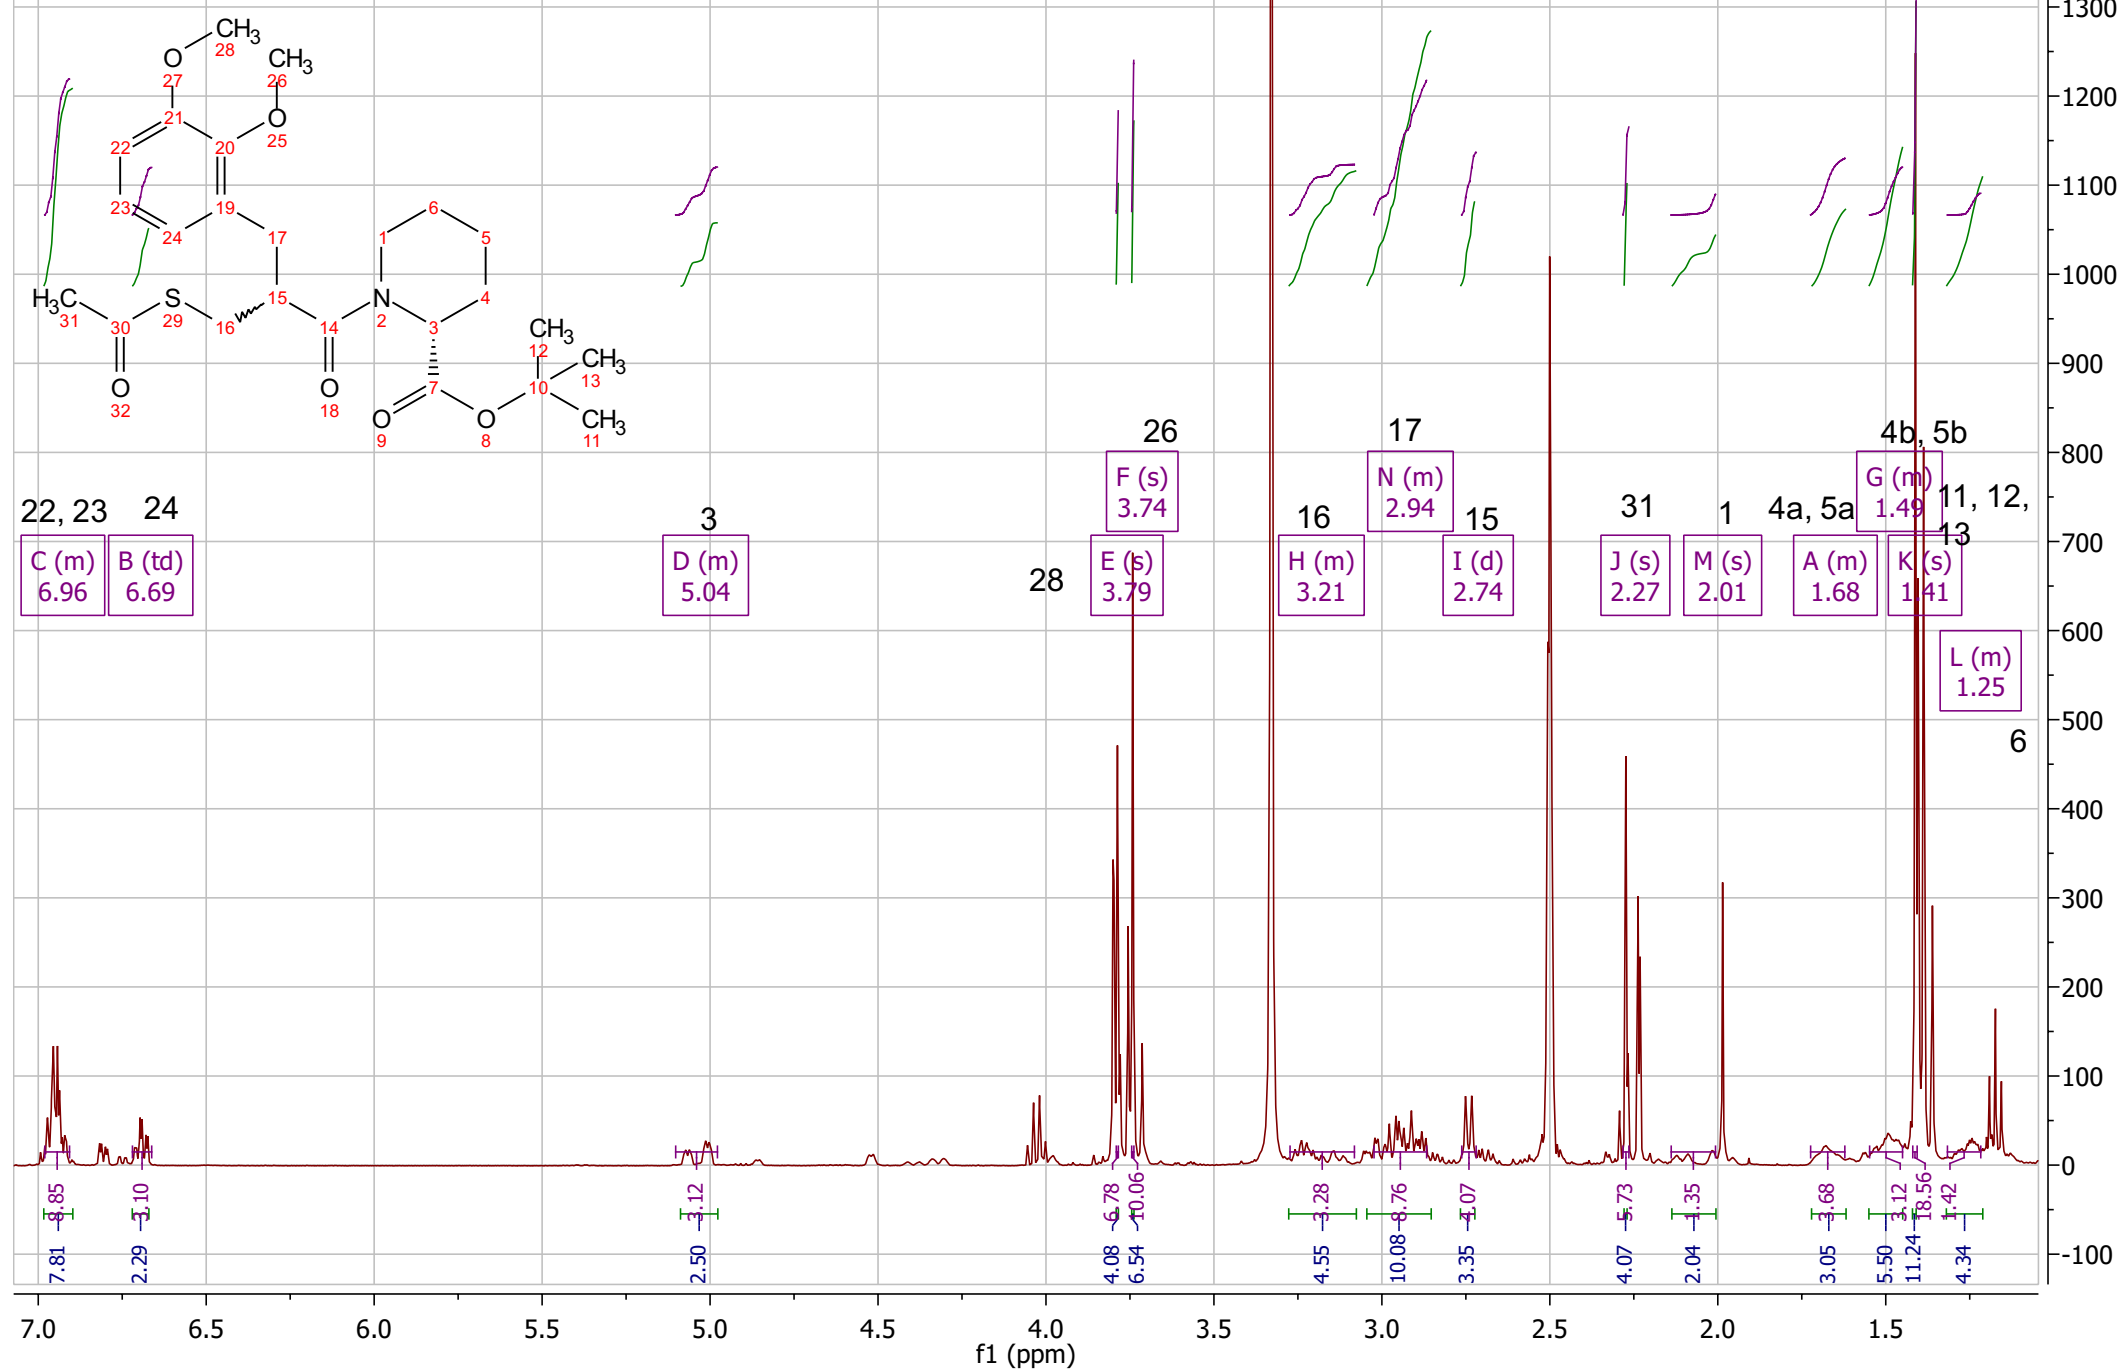



AV400-2021-09-28-mjrpro.42399.1.fid

Group AK\_Proshak

mjr341

<sup>1</sup>H DMSO /nmr Tag-Messung 35

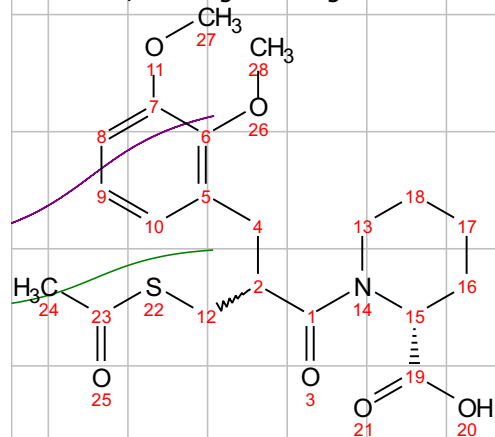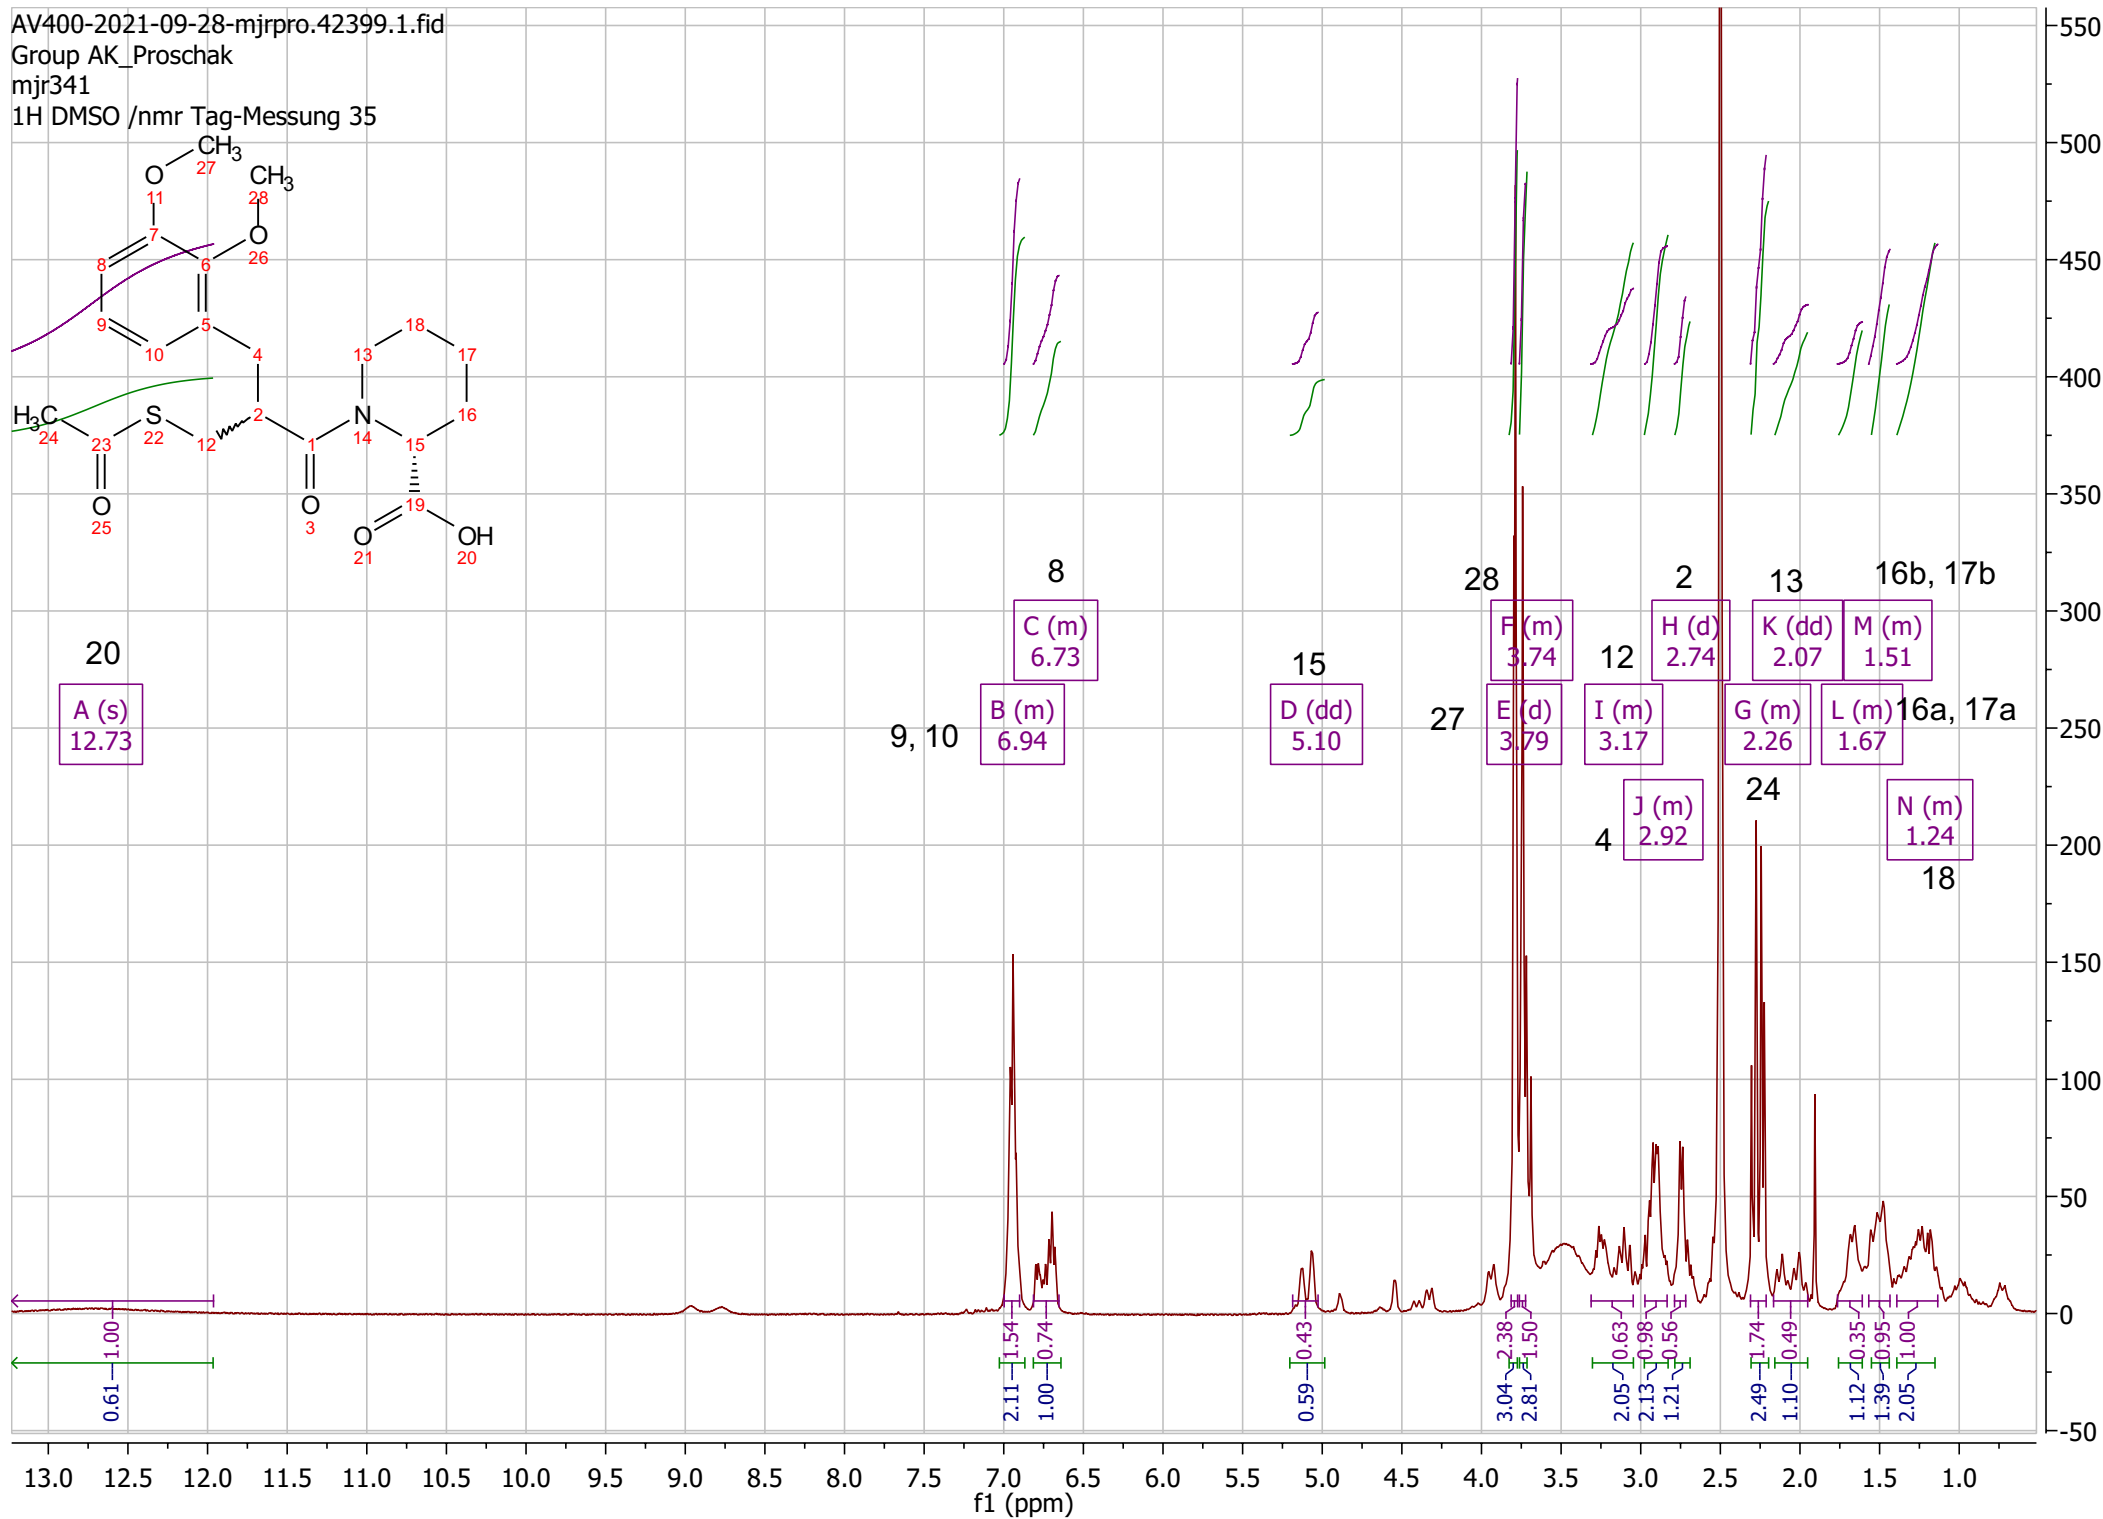

AV500-2021-07-19-mjrpro.37217.1.fid  
 Group AK\_Proschak  
 mjr344-1  
 1H DMSO /nmr/Tag-Messung Tag-Messung 57

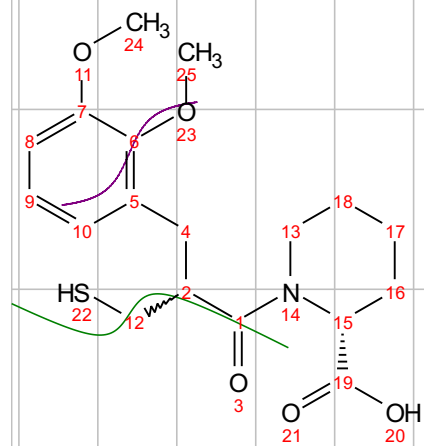

<sup>1</sup>H NMR (500 MHz, DMSO-*d*<sub>6</sub>) δ 12.80 (s, 1H), 7.00 – 6.88 (m, 2H), 6.79 – 6.68 (m, 1H), 5.14 (ddd, *J* = 35.7, 6.1, 2.2 Hz, 1H), 4.04 (d, *J* = 13.5 Hz, 1H), 3.79 (d, *J* = 3.2 Hz, 3H), 3.76 – 3.73 (m, 3H), 3.30 – 3.15 (m, 2H), 3.14 – 3.02 (m, 2H), 2.85 (dd, *J* = 13.6, 4.9 Hz, 1H), 2.12 (dd, *J* = 10.1, 6.9 Hz, 2H), 1.71 – 1.61 (m, 2H), 1.53 – 1.45 (m, 2H), 1.32 – 1.23 (m, 2H).

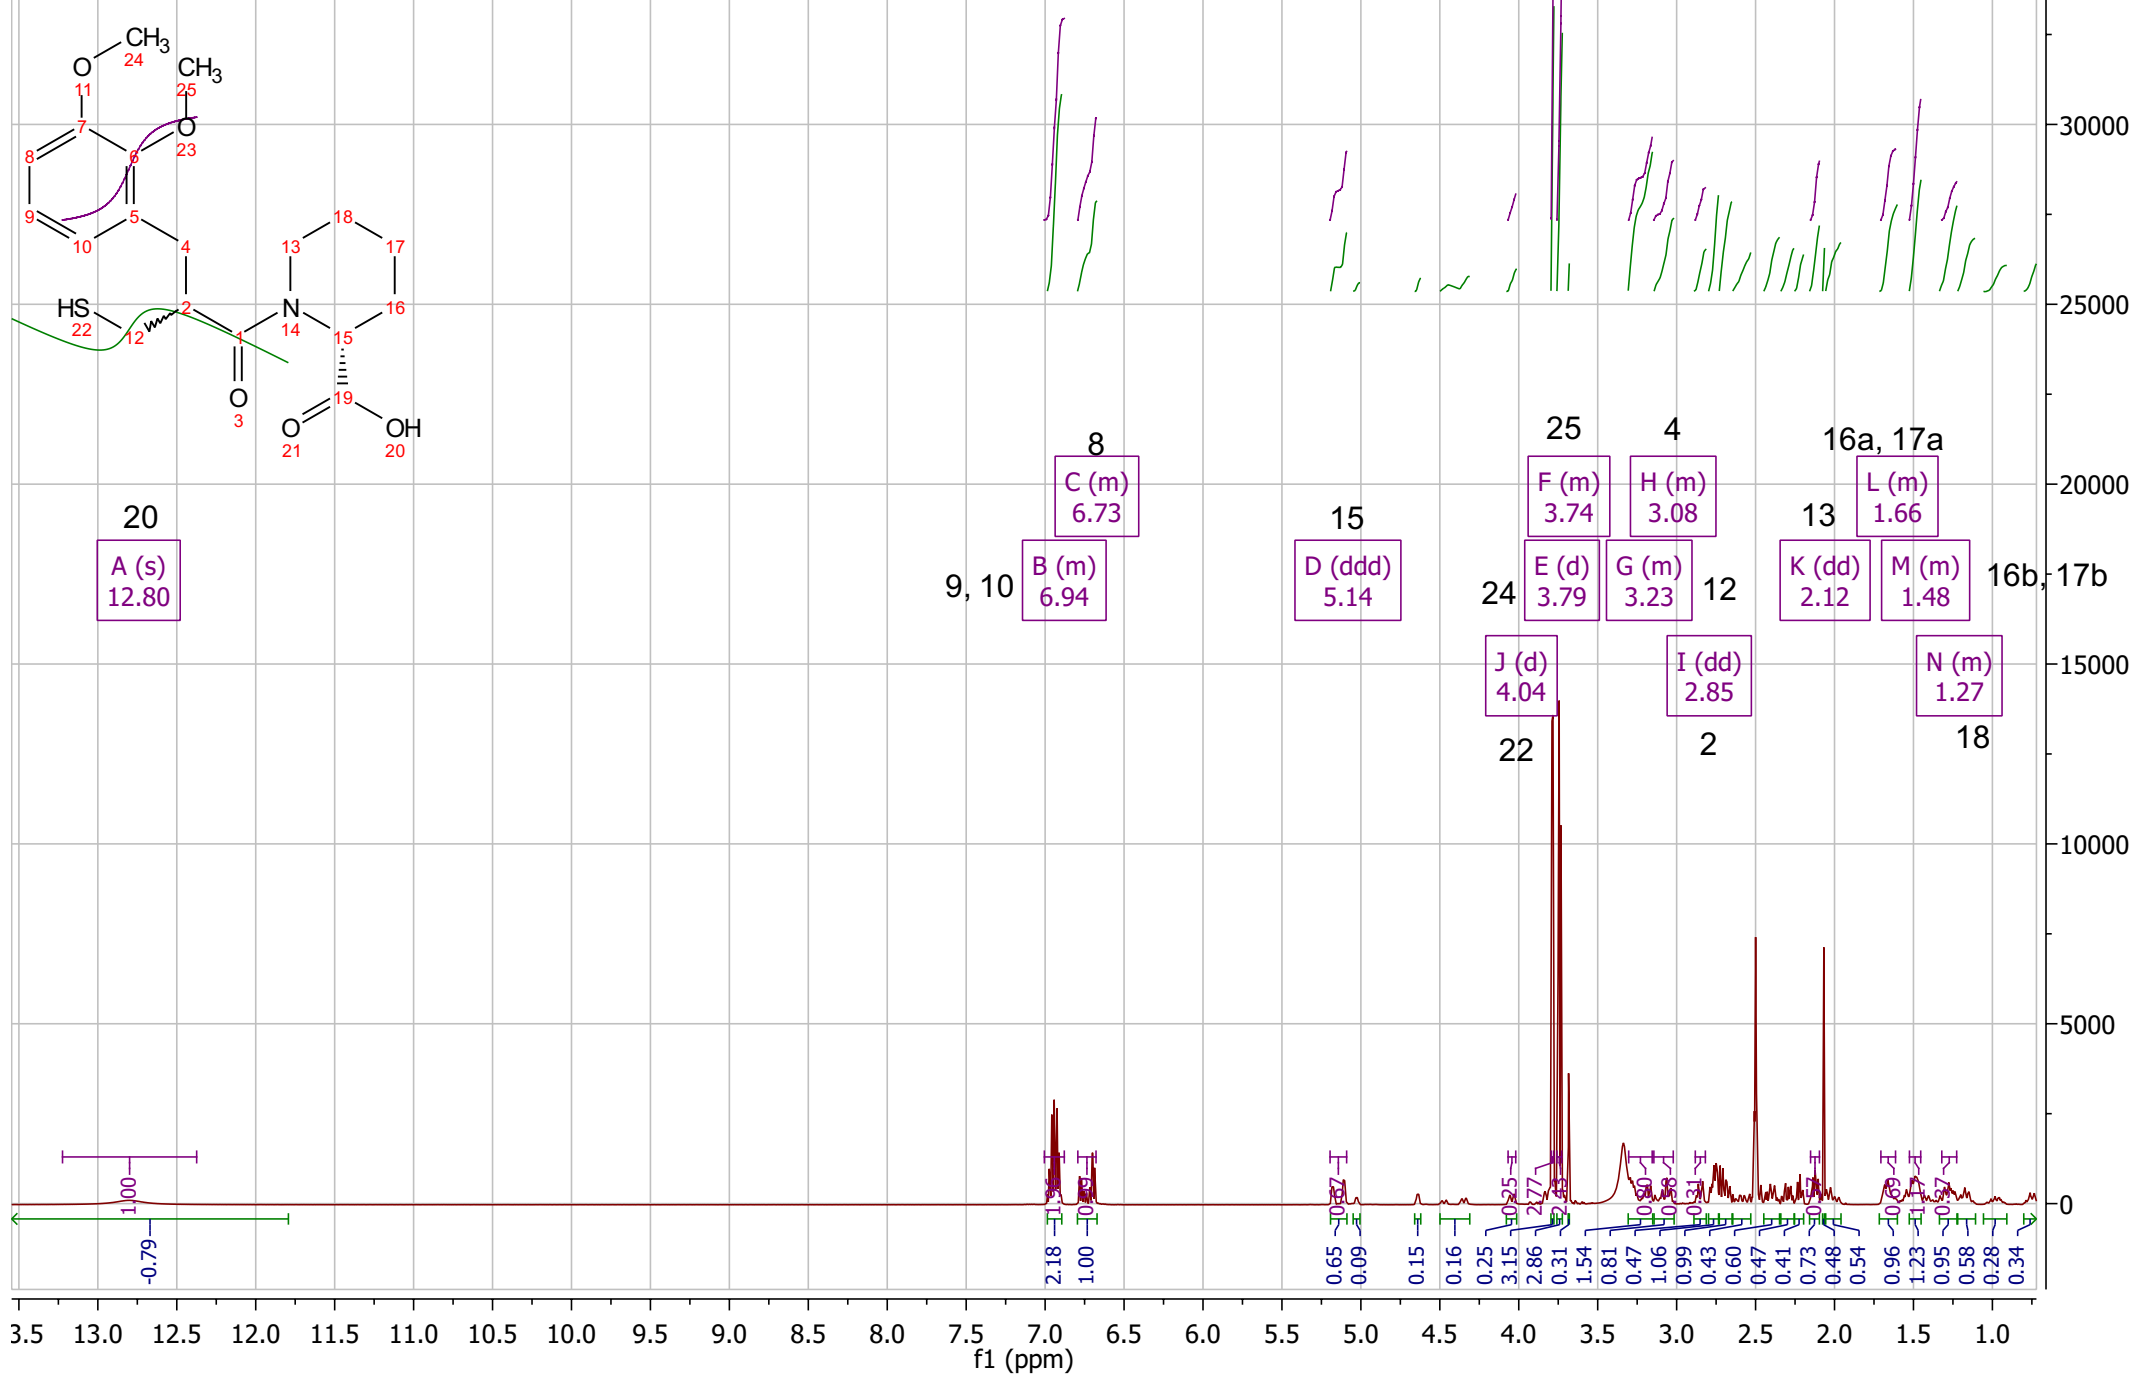

AV400-2021-02-08-mjrpro.39774.1.fid

Group AK\_Proσχak

mjr310-9

<sup>1</sup>H DMSO /nmr Tag-Messung 20

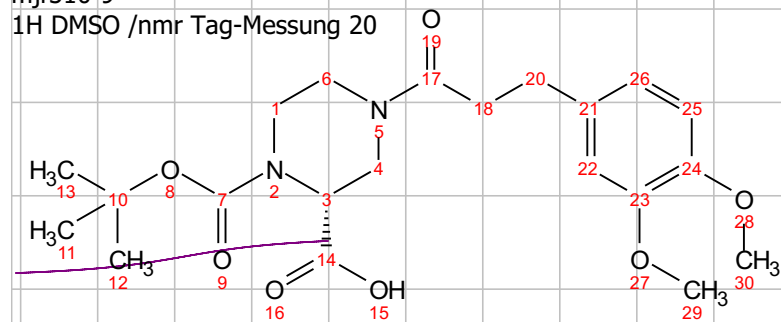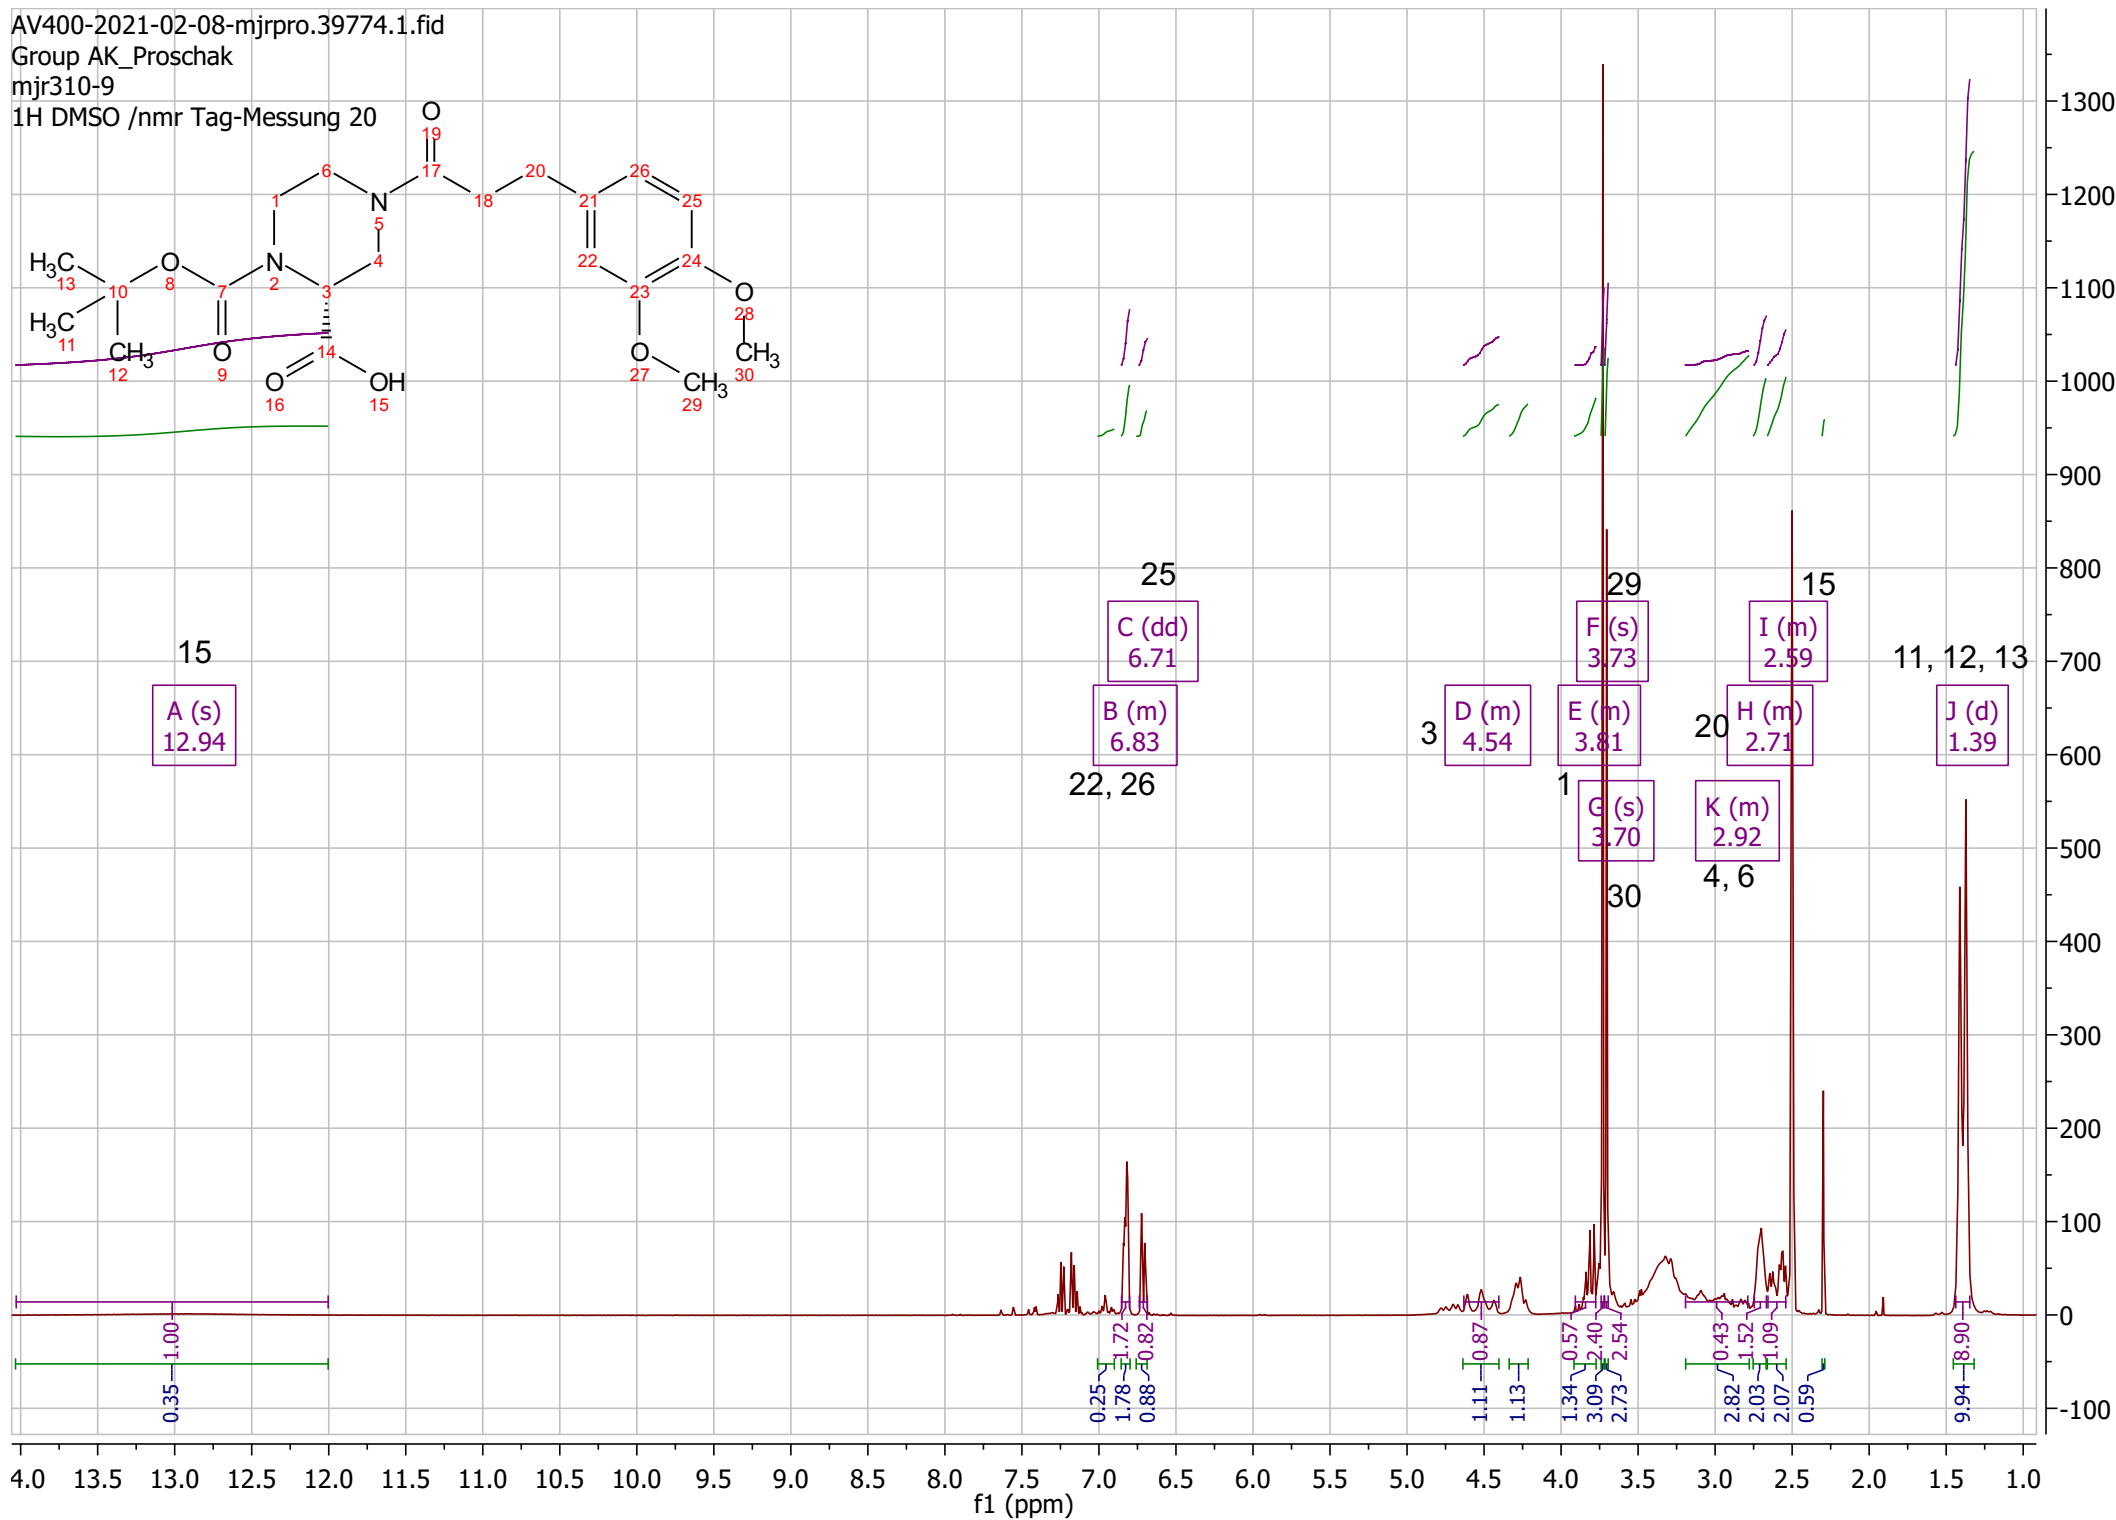

DRX600-2021-02-08-mjrpro.5426.1.fid  
Group AK\_Proshak  
mjr312-1

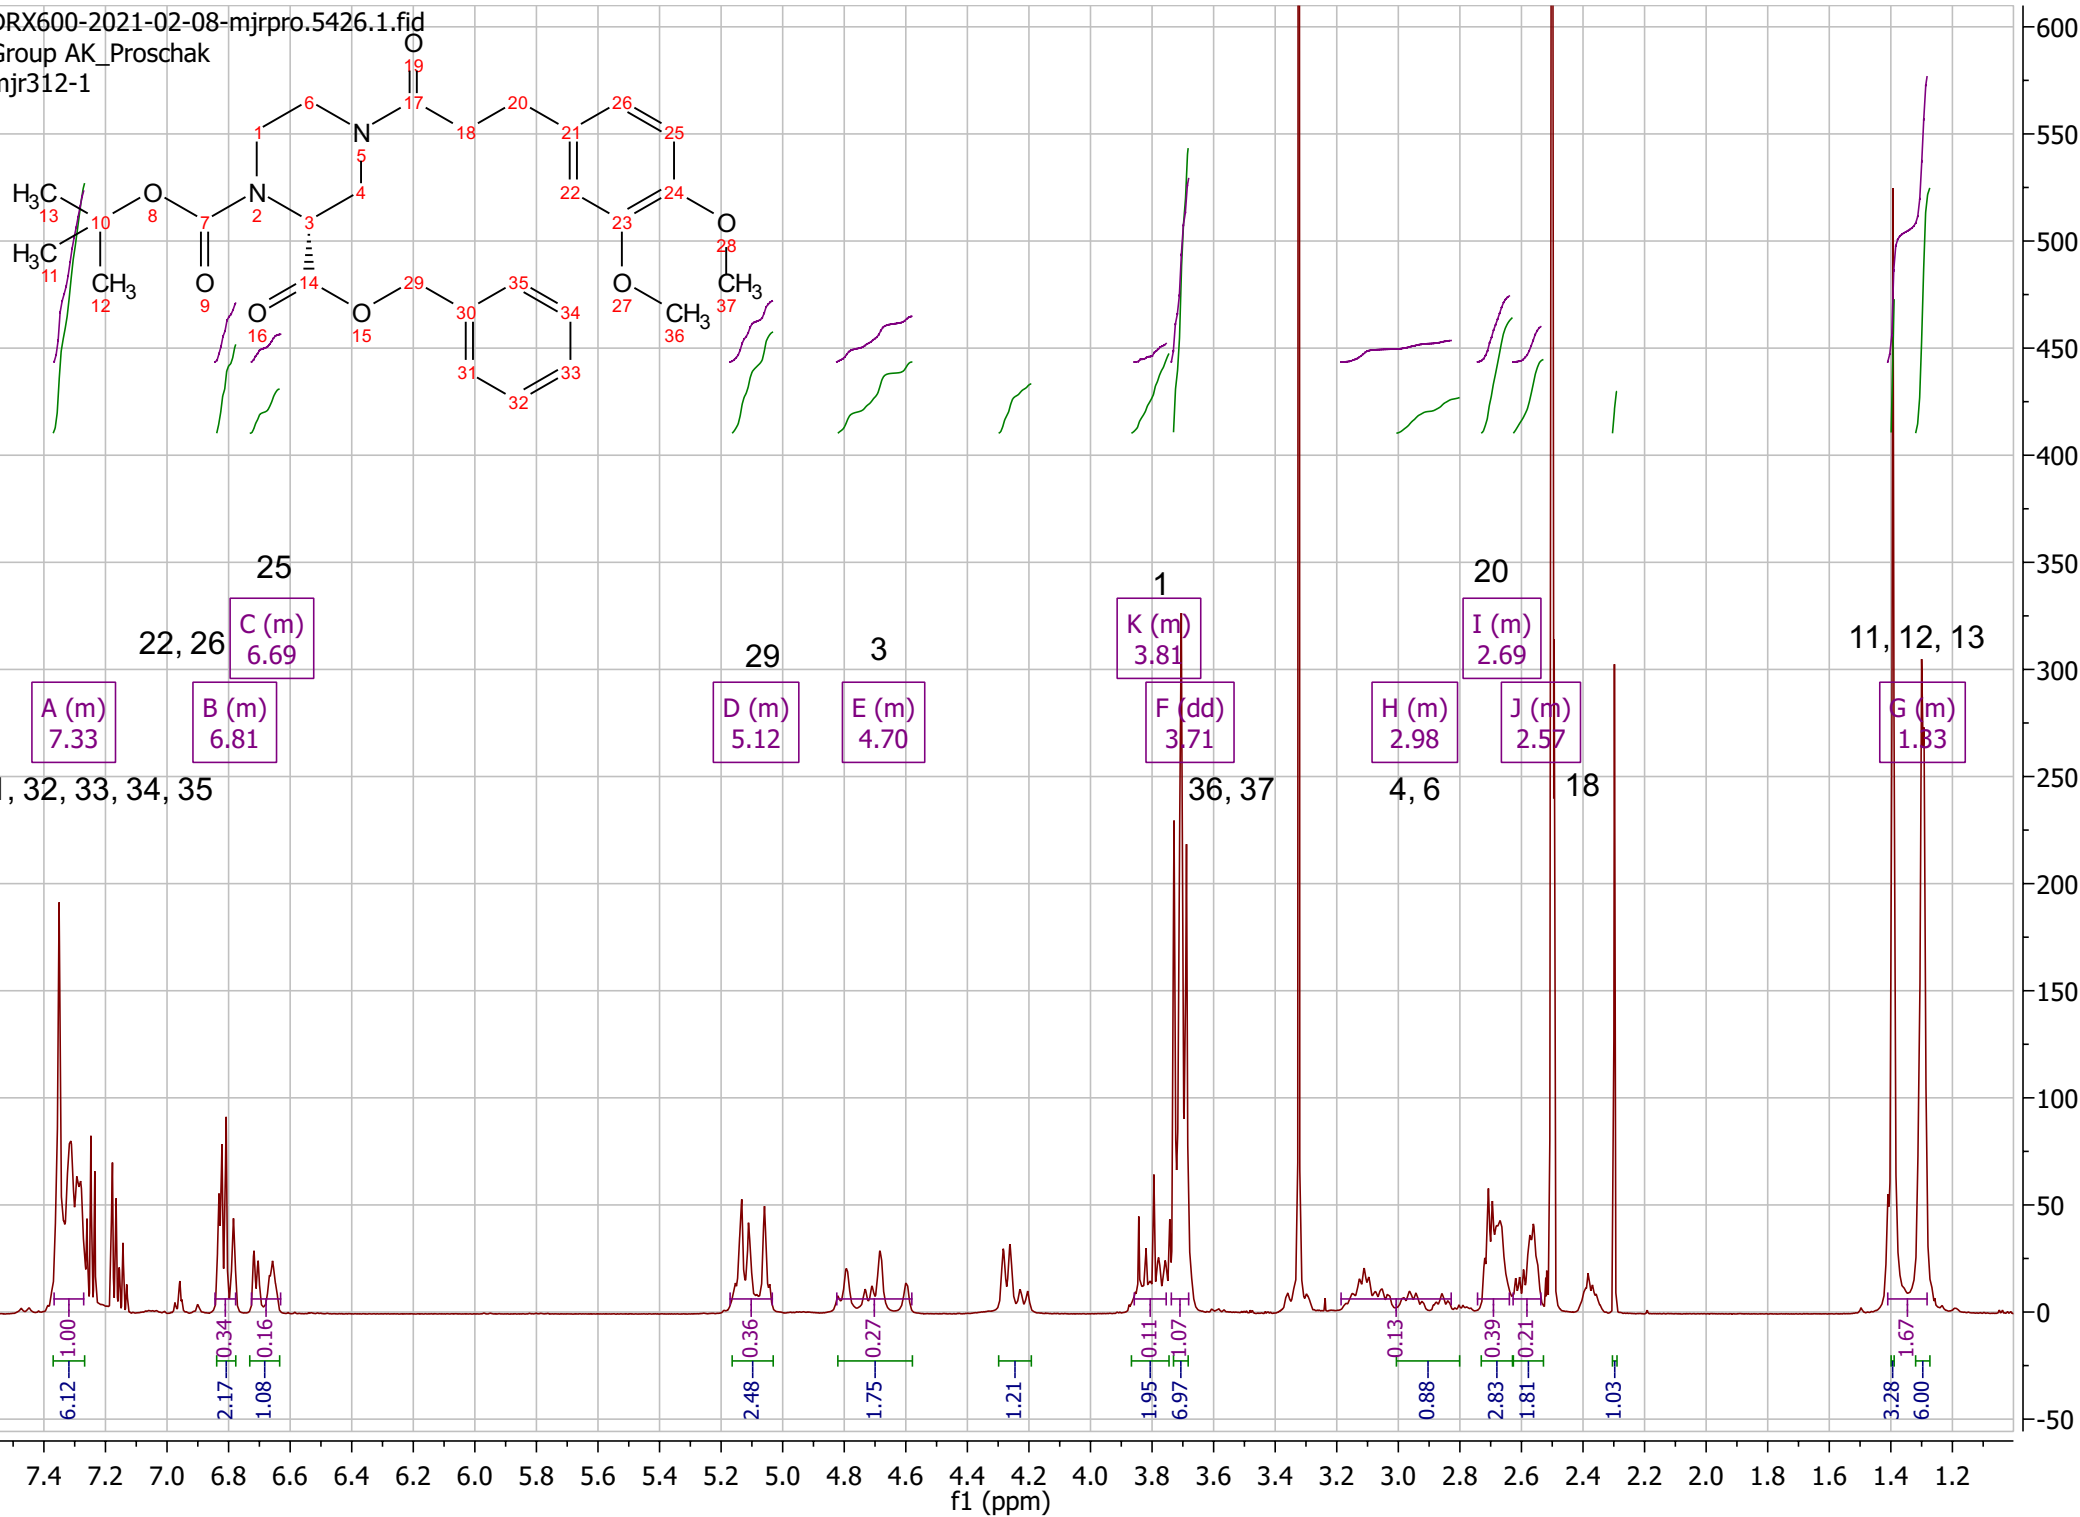

DRX600-2021-02-08-mjrpro.5427.1.fid

Group AK\_Proshak

mjr314-P

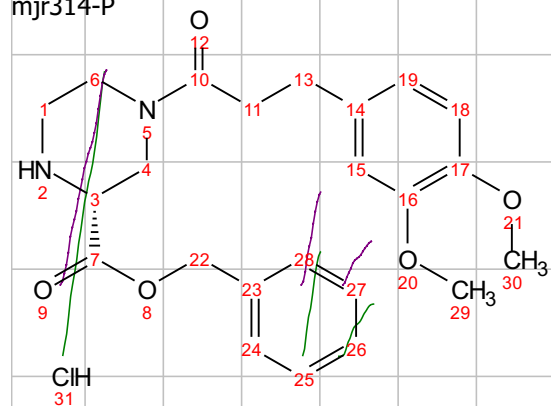

24, 25, 26, 27, 28

A (m)  
7.40

15, 19

B (m)  
6.82

18  
C (dd)  
6.71

22

D (s)  
5.25

3

J (m)  
4.38

29, 30

E (m)  
3.71

2

H (s)  
3.56

1

I (td)  
3.25

4, 6

K (m)  
3.00

11

G (dd)  
2.65

13

F (q)  
2.72

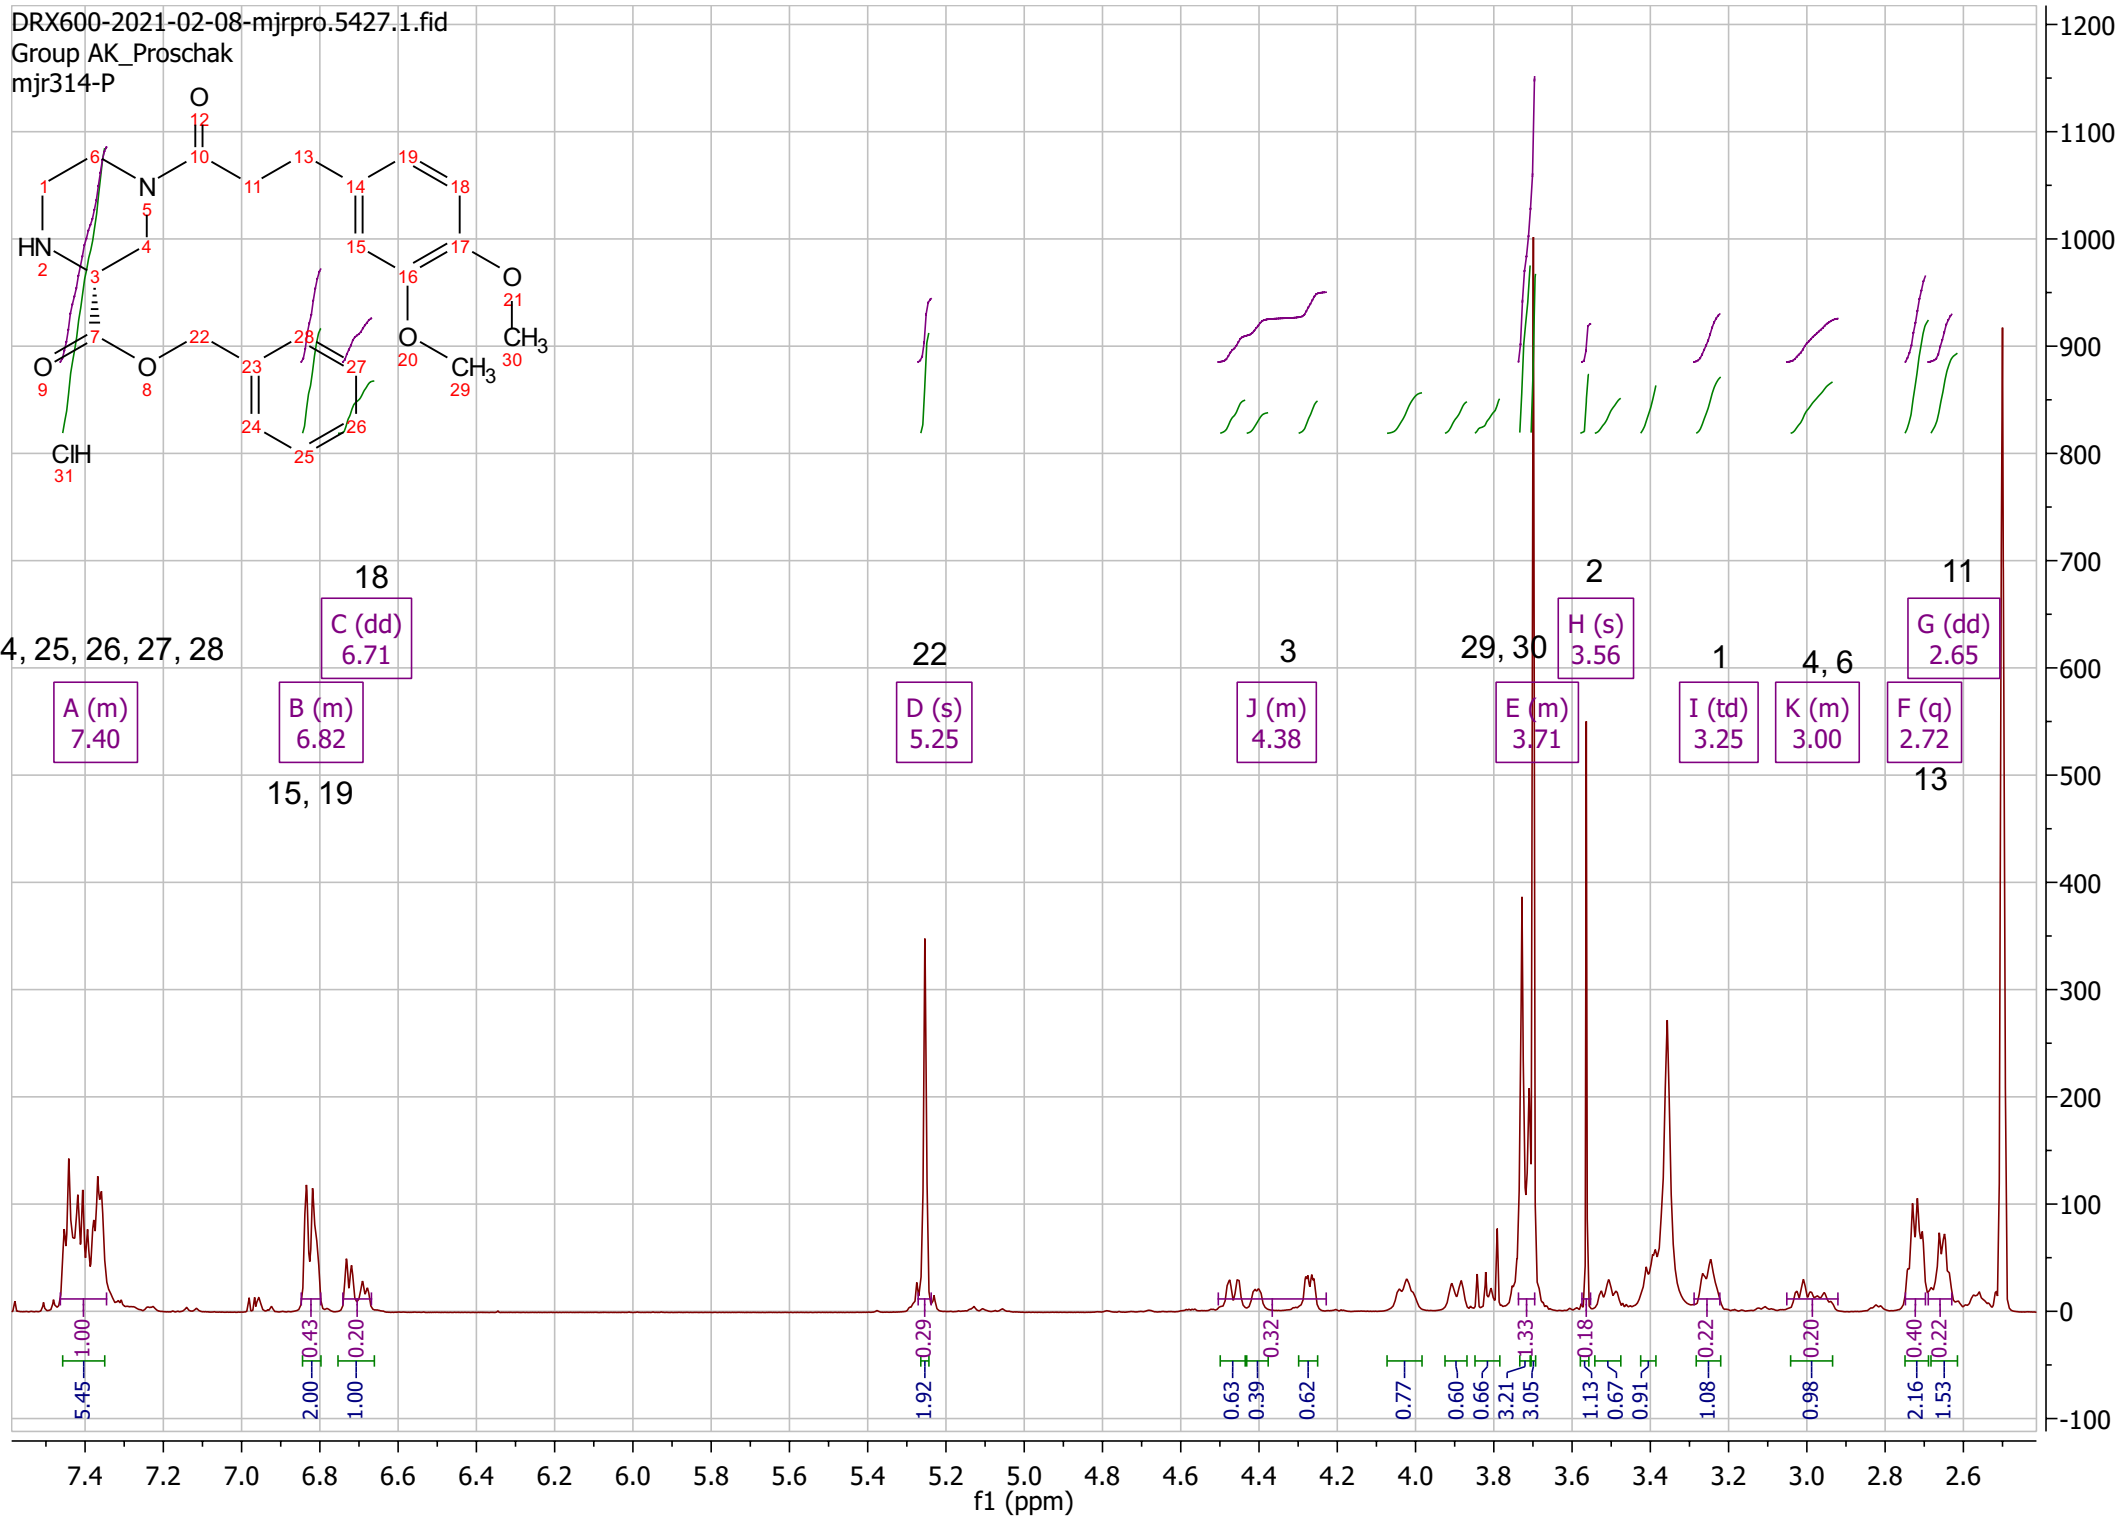

DRX600-2021-02-08-mjrpro.5428.1.fid

Group AK\_Proshak

mjr318-1

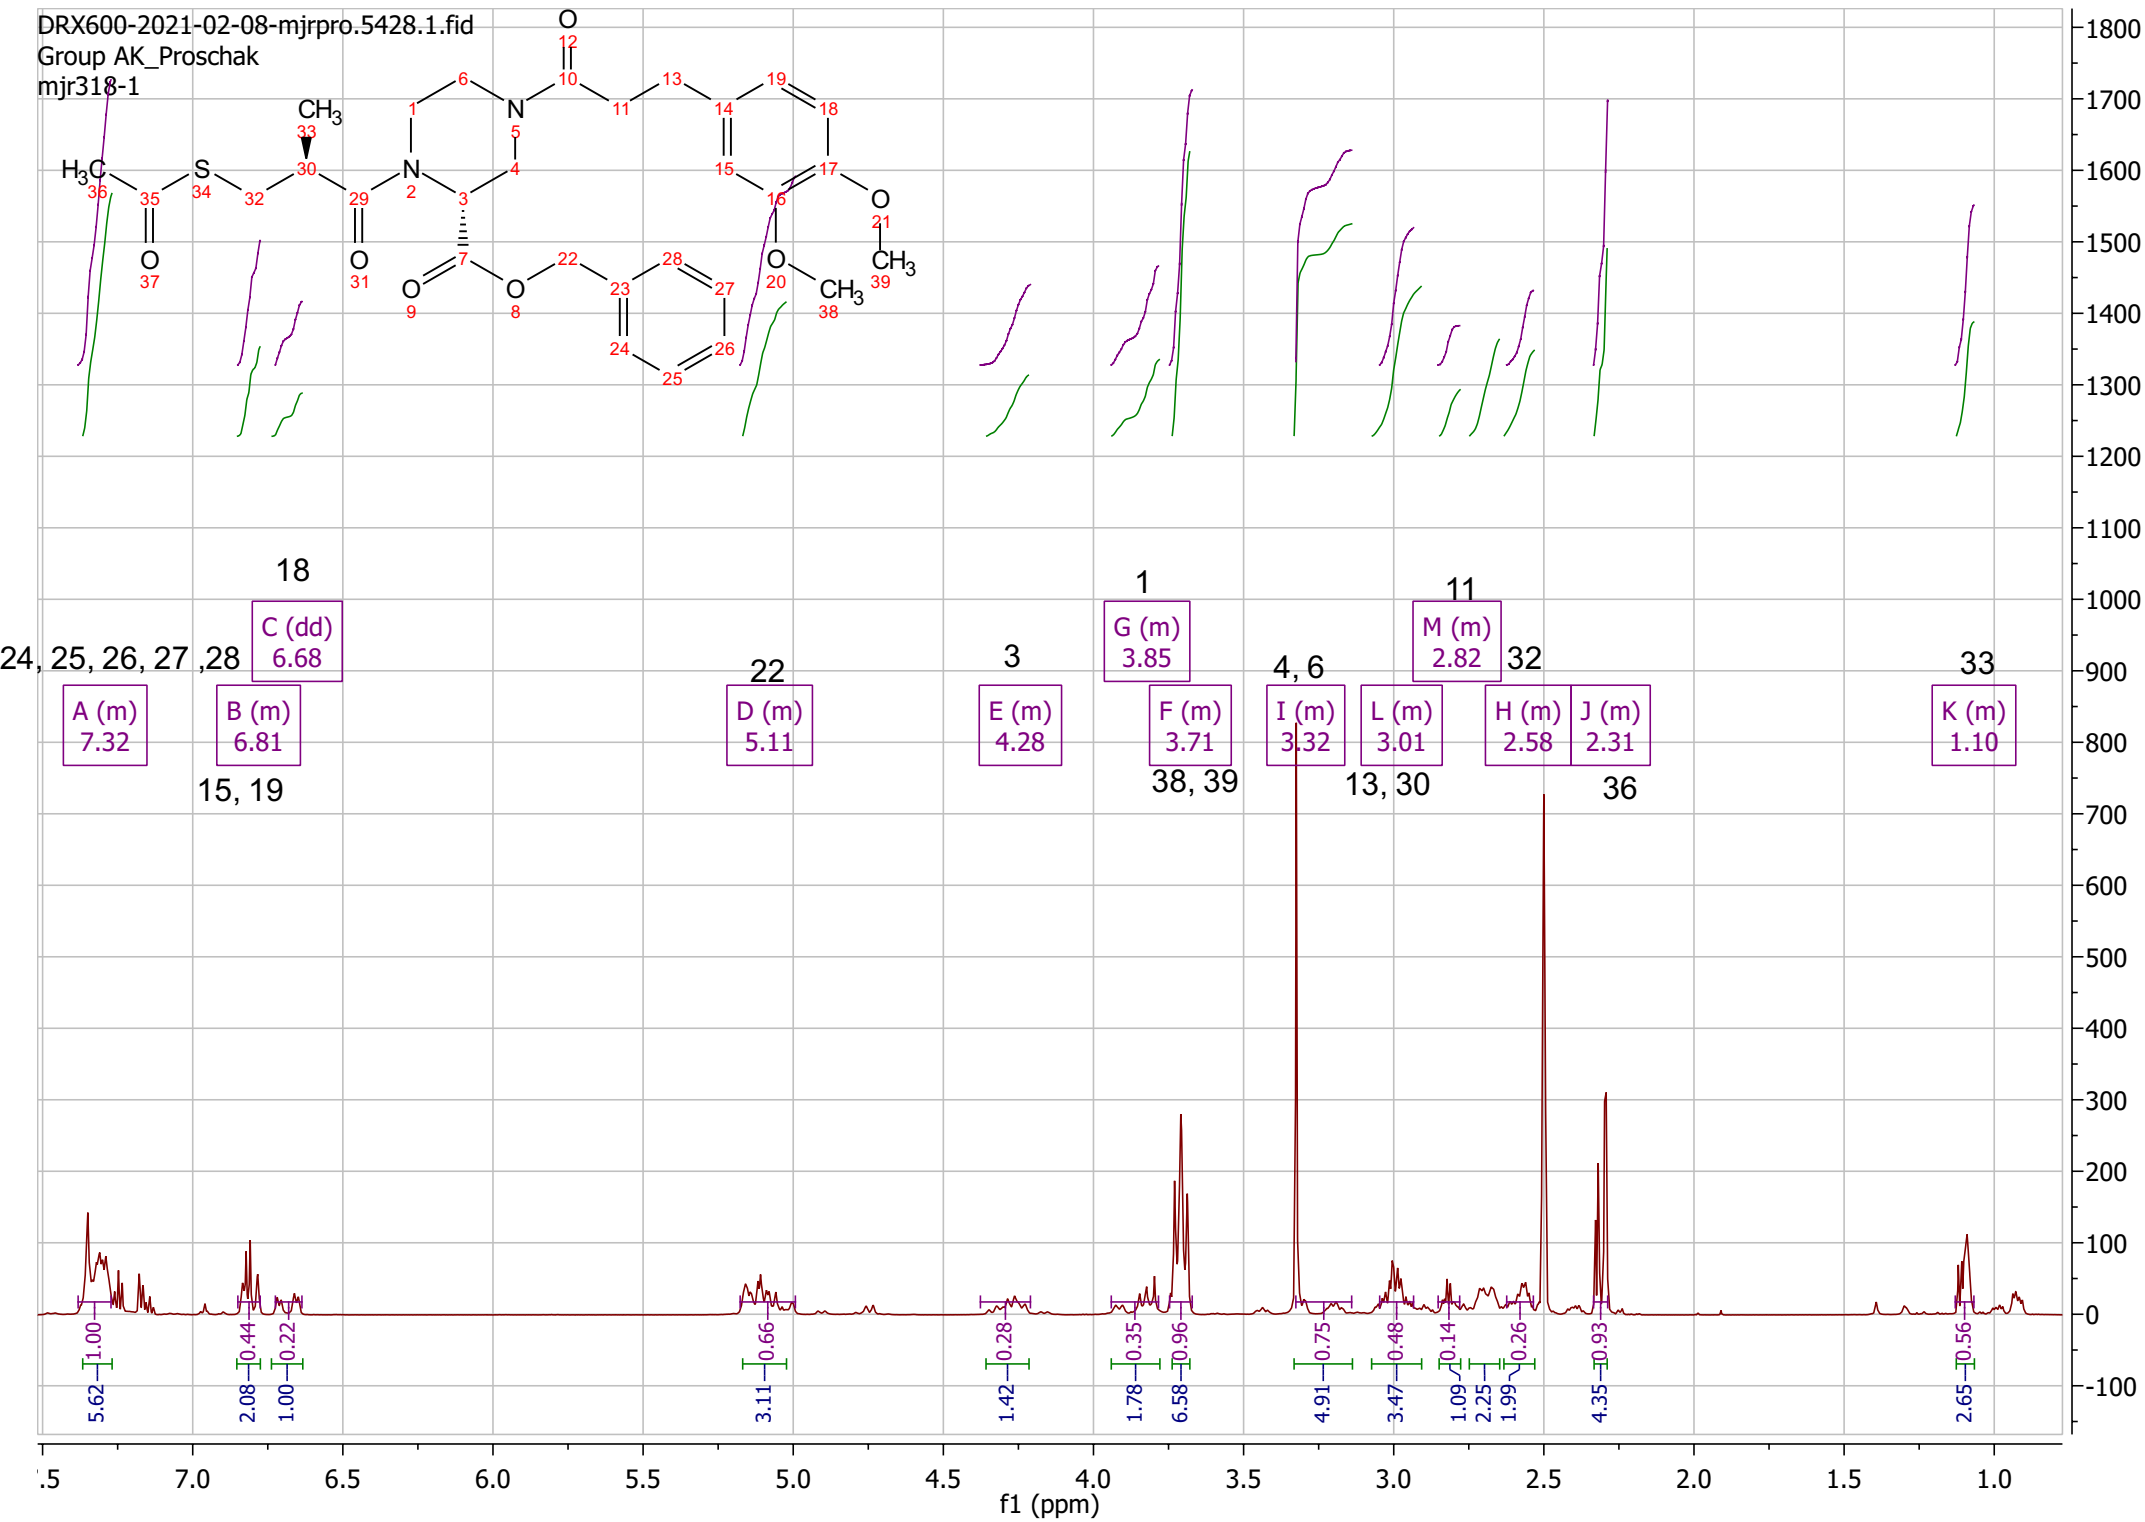

AV500-2021-05-05-mjrpro.36572.5.fid  
Group AK\_Proshak  
mjr324-1  
1H DMSO /nmr/Tag-Messung Tag-Messung 8

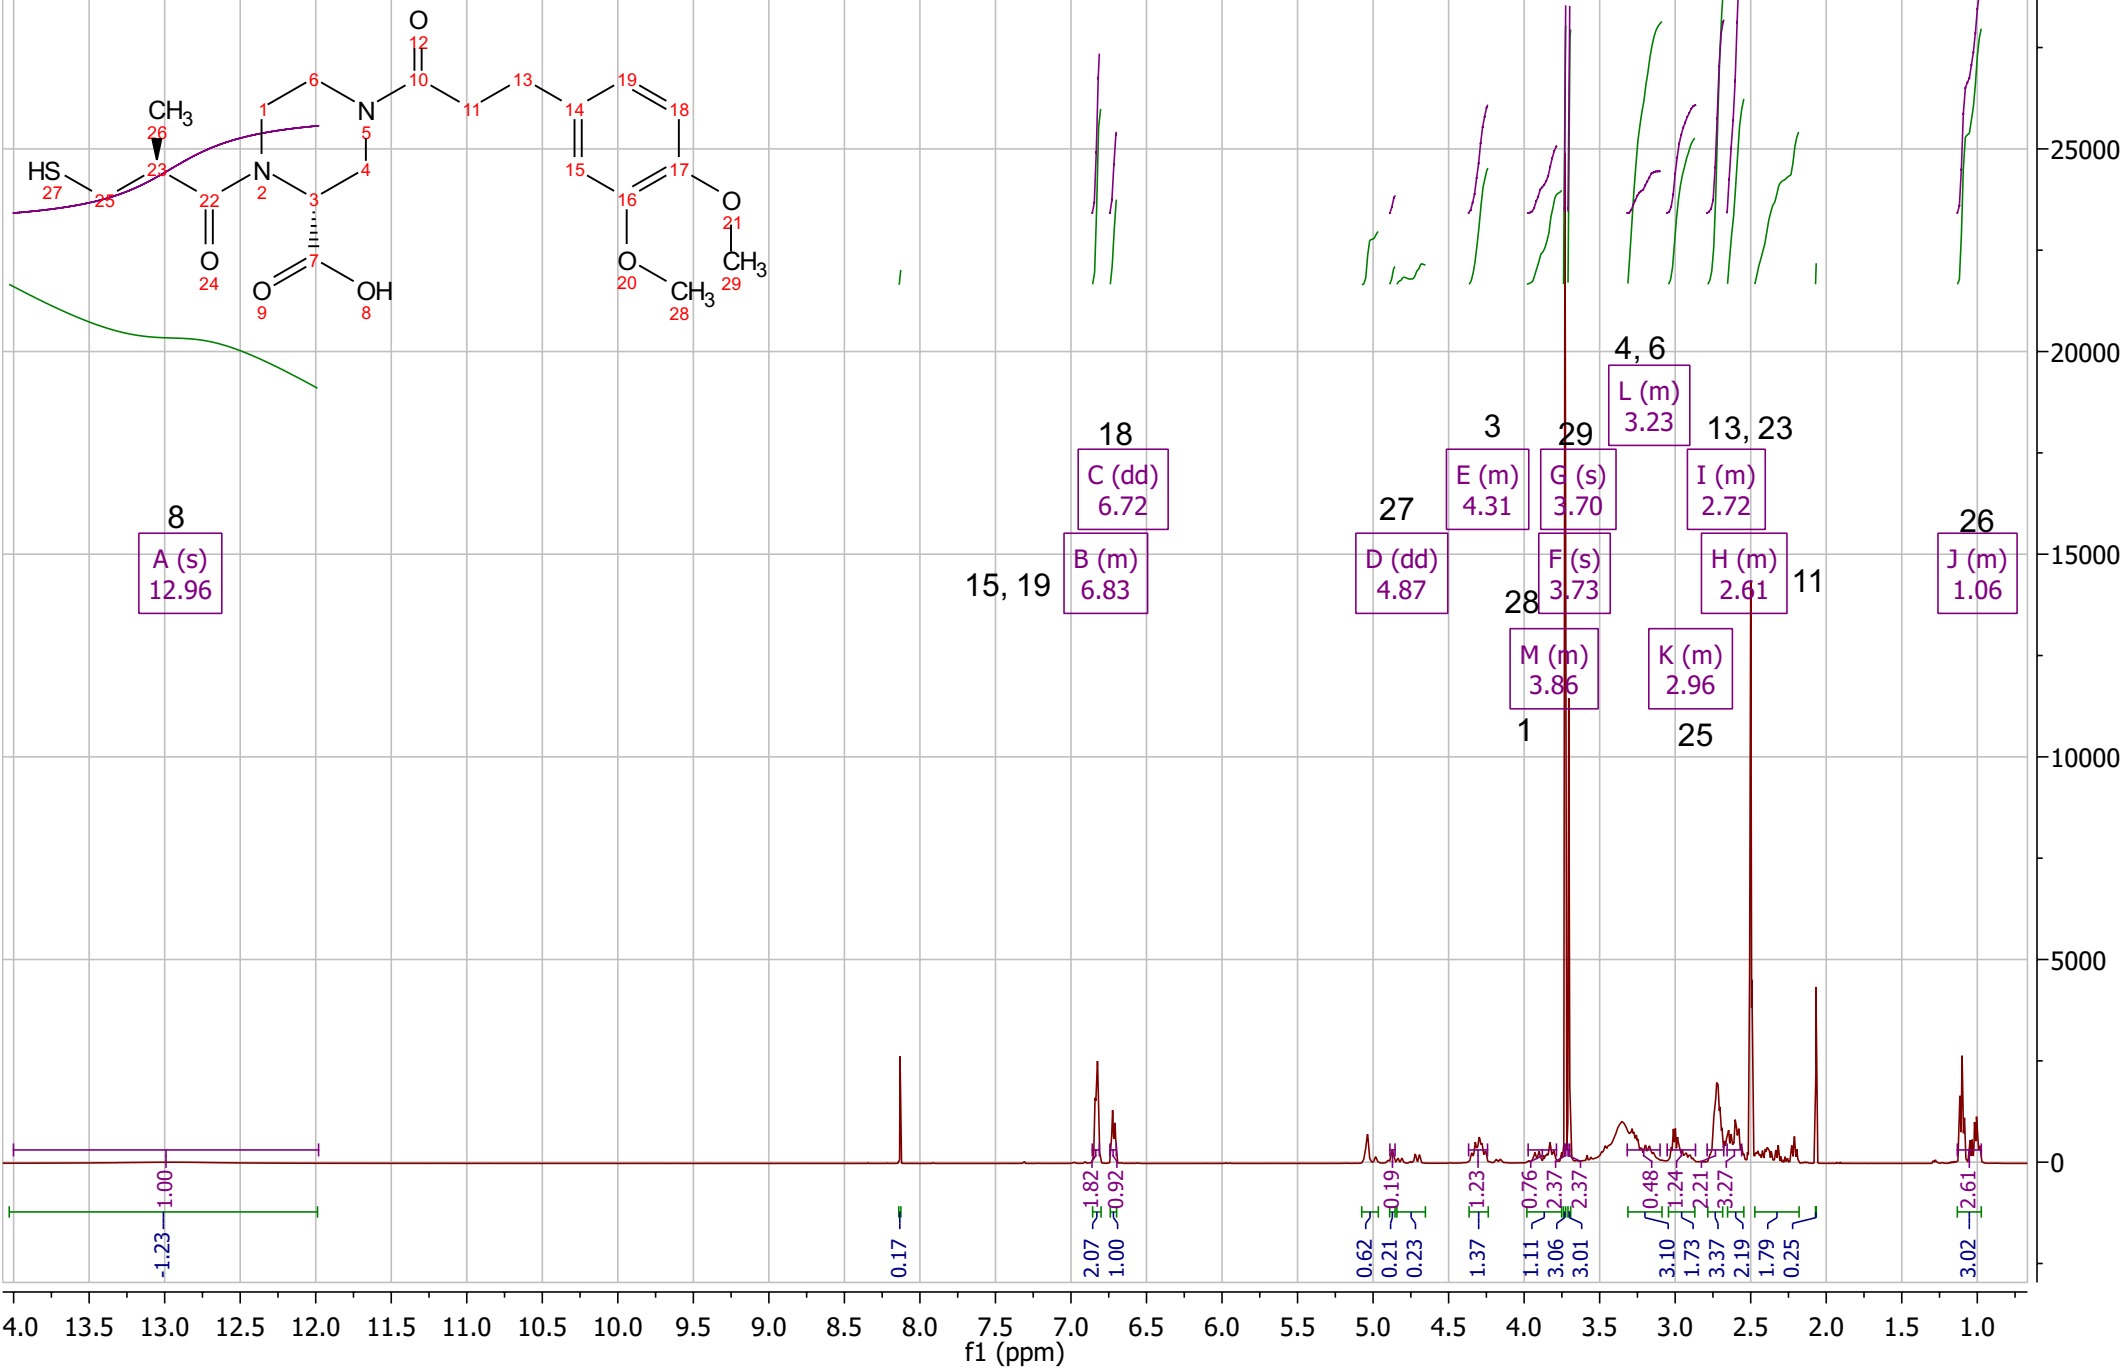

$^1\text{H}$  NMR (400 MHz,  $\text{DMSO}-d_6$ )  $\delta$  3.24 (dd,  $J = 9.7, 3.4$  Hz, 1H), 2.95 (dtd,  $J = 12.0, 3.8, 1.3$  Hz, 1H), 2.58 – 2.53 (m, 1H), 2.53 – 2.51 (m, 1H), 1.82 – 1.75 (m, 1H), 1.70 – 1.64 (m, 1H), 1.50 – 1.43 (m, 1H), 1.41 (s, 9H), 1.40 – 1.28 (m, 3H).

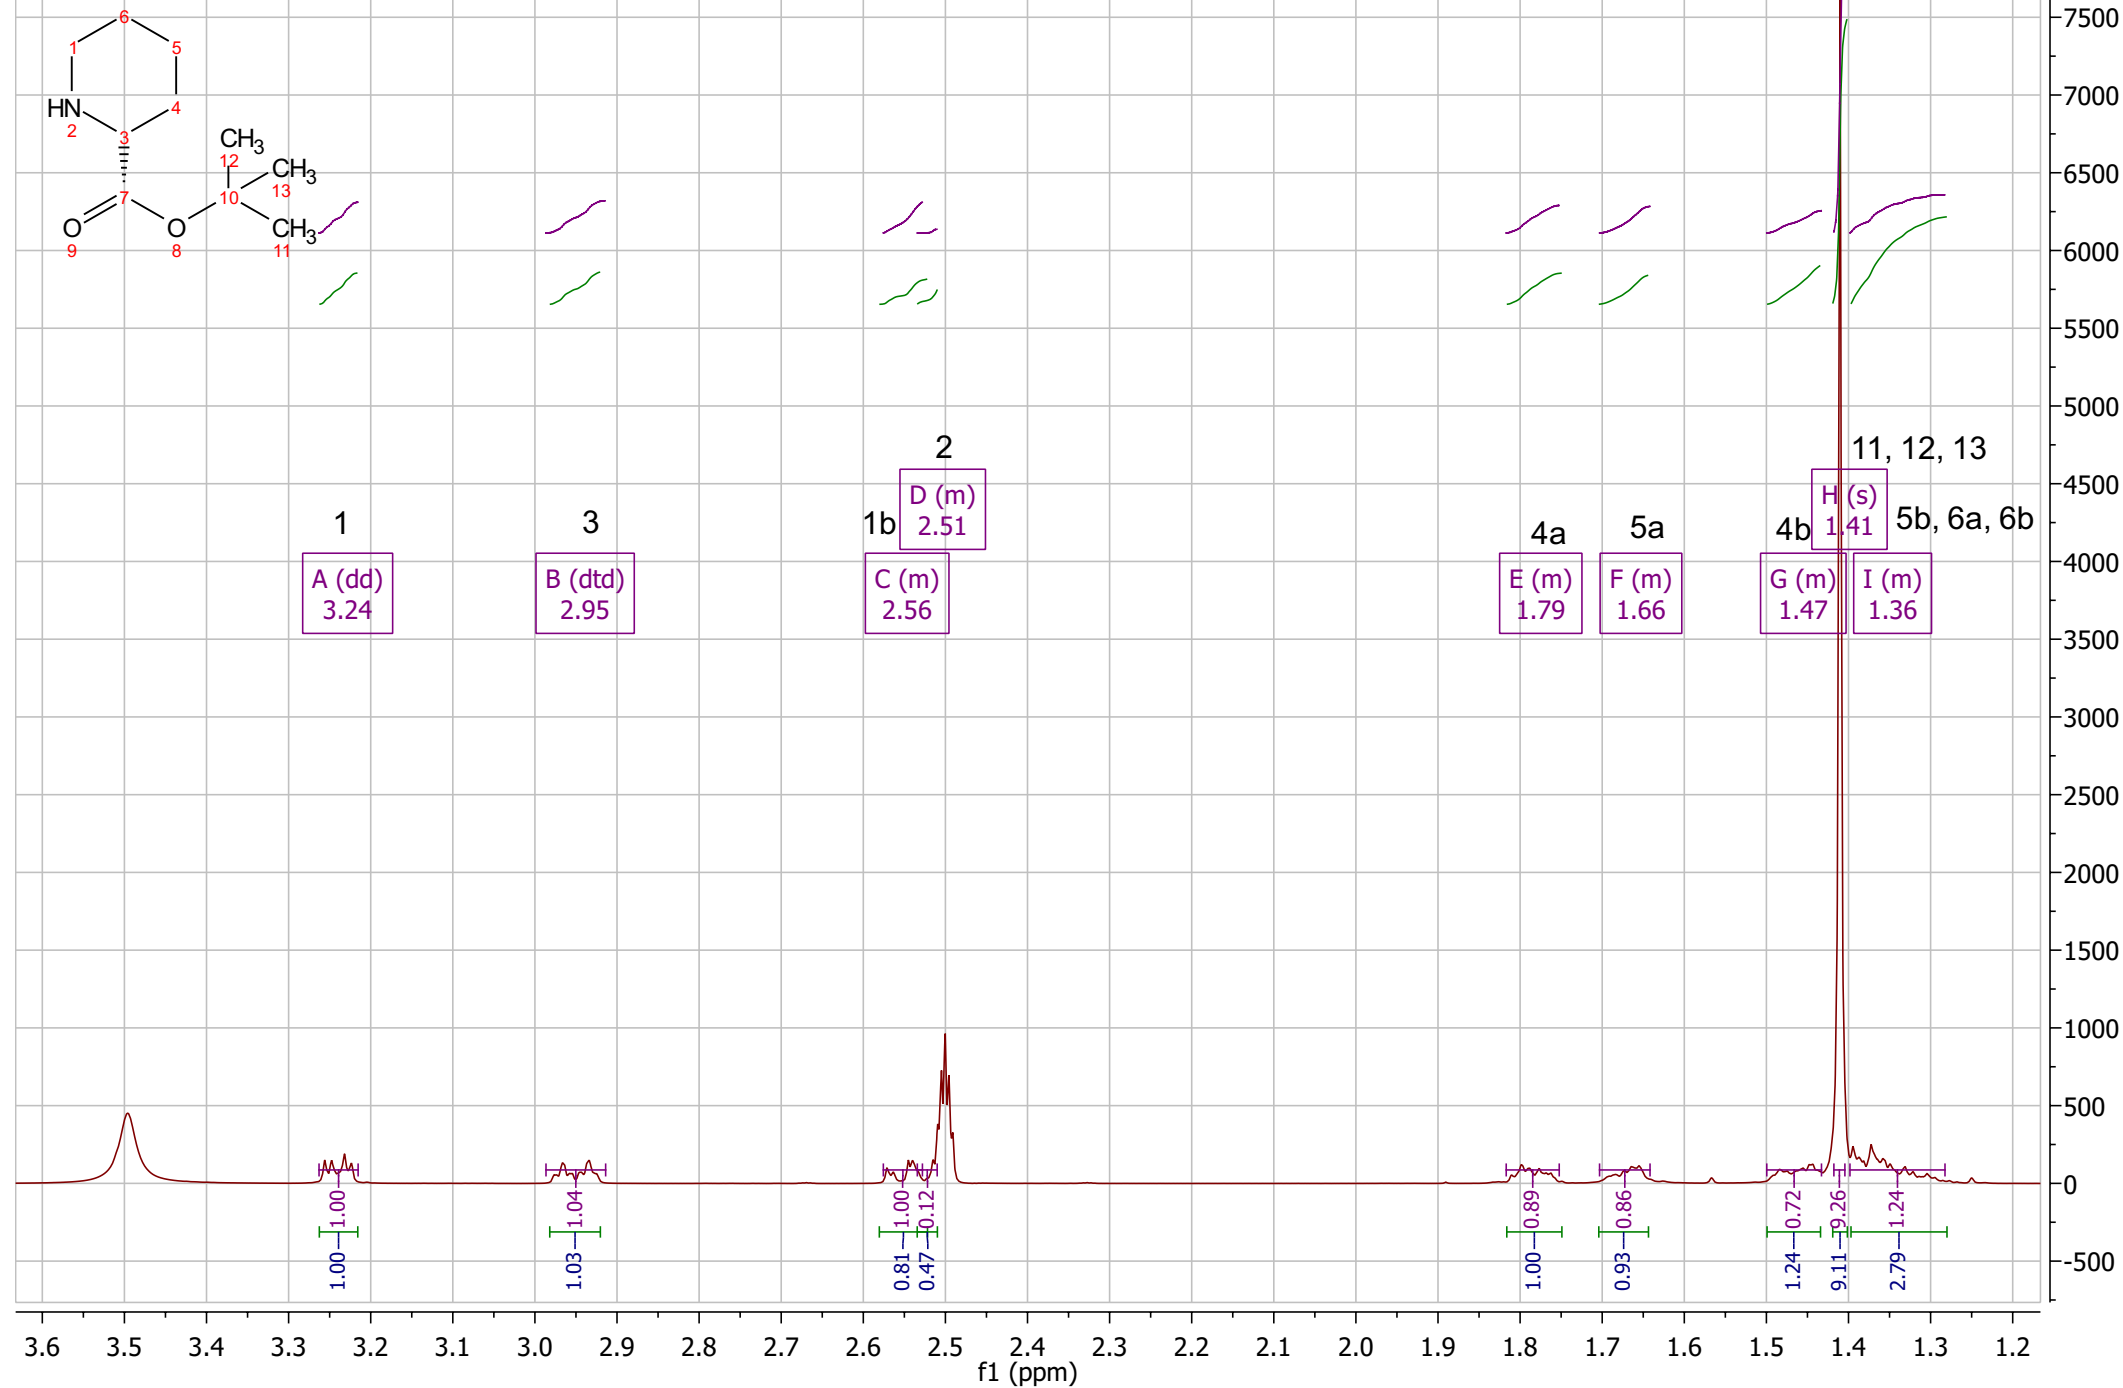

Supplement: s1 [file s1]
